# Supplementary material for: α-Ketoglutarate Inhibits Thrombosis and Inflammation by Prolyl Hydroxylase-2 Mediated Inactivation of Phospho-Akt
Source: PubMed Central journal article supplement — eBioMedicine. 2021 Nov 2;73:103672. doi: 10.1016/j.ebiom.2021.103672 (PMC8579134; doi:10.1016/j.ebiom.2021.103672), 2021-11-02

# $\alpha$ -Ketoglutarate Inhibits Thrombosis and Inflammation by Prolyl Hydroxylase-2 Mediated Inactivation of Phospho-Akt

Shrimali NM *et al.*

*Supplementary western blots: uncut blots of main figures*

**Fig. 1 a**

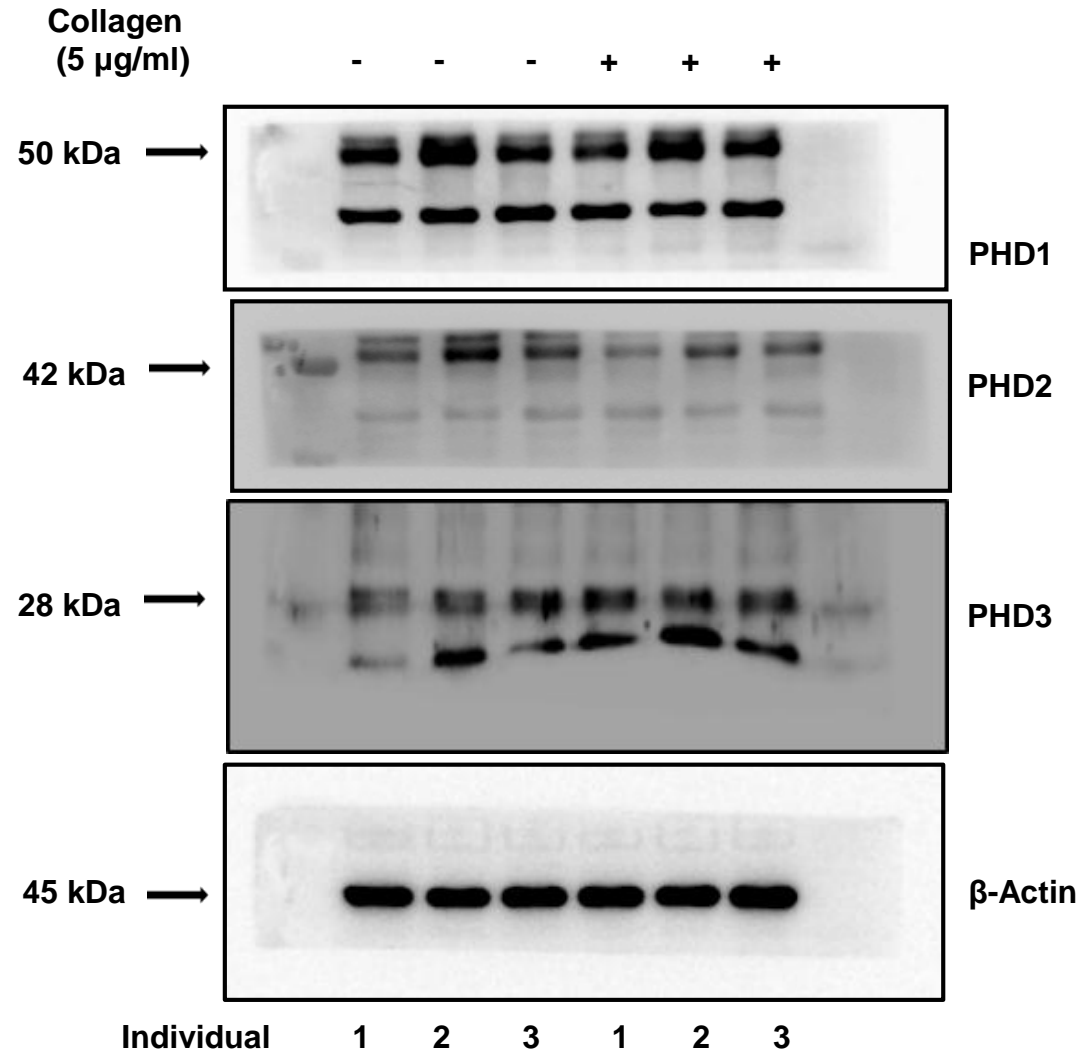

**Fig. 1 b**

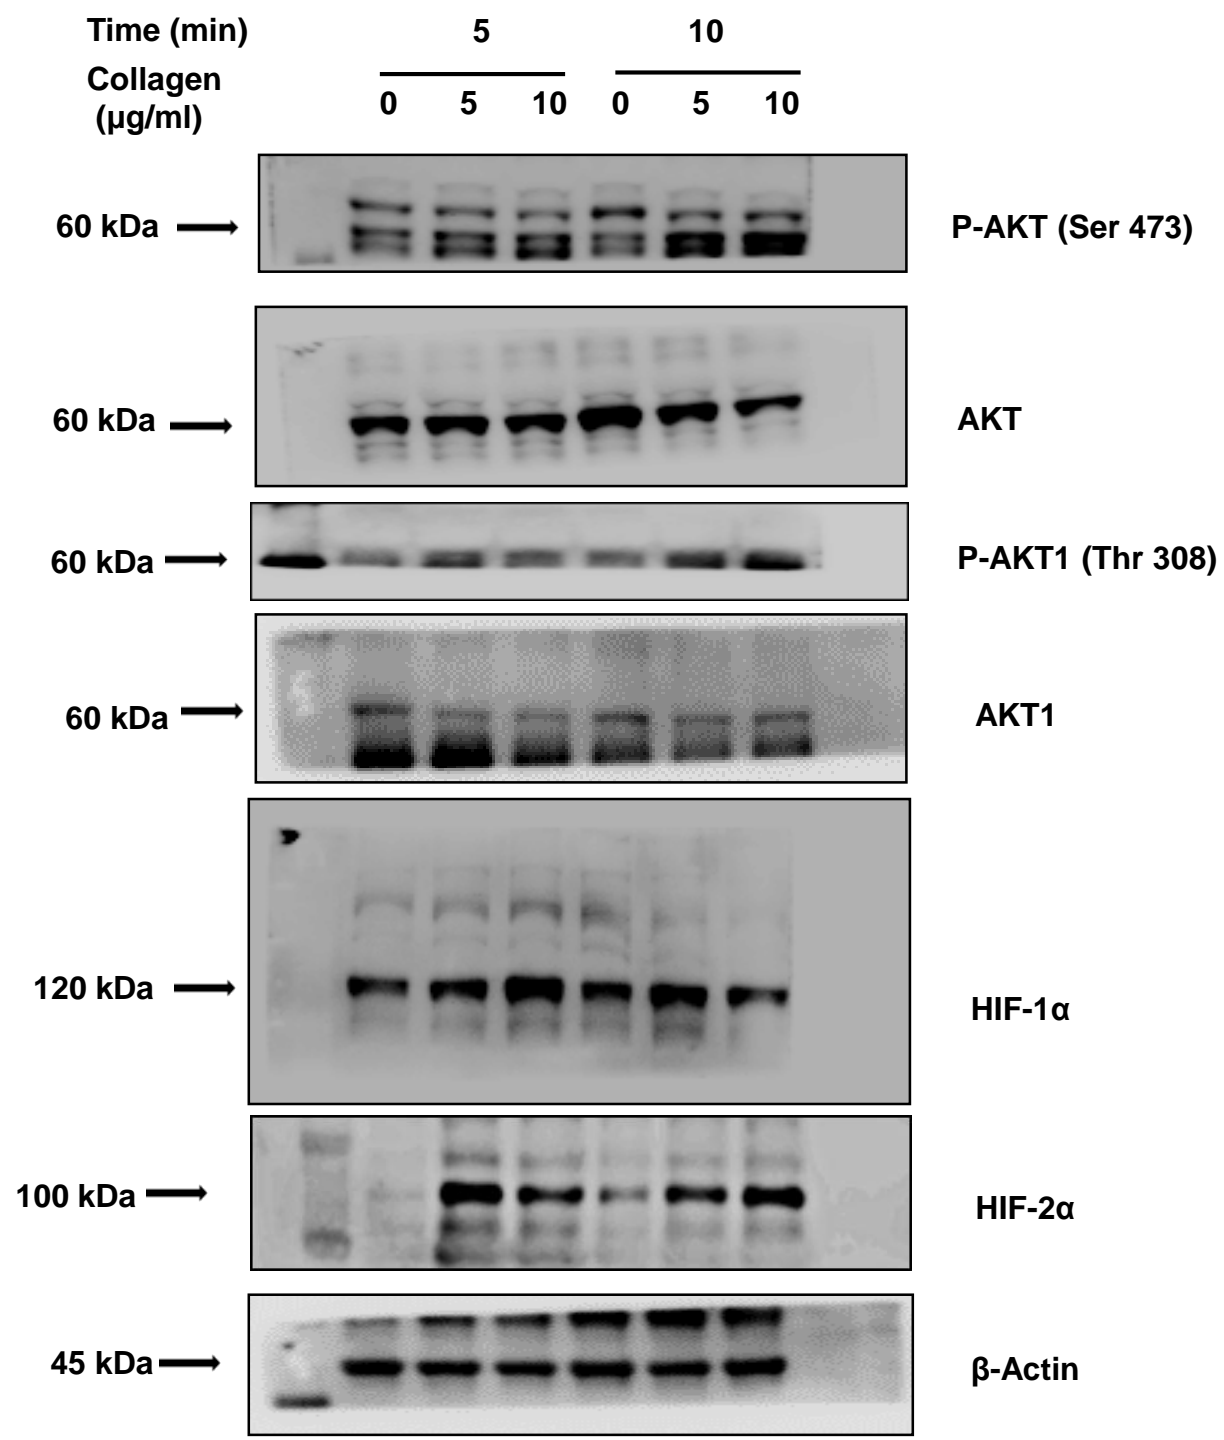

**Fig. 1 e**

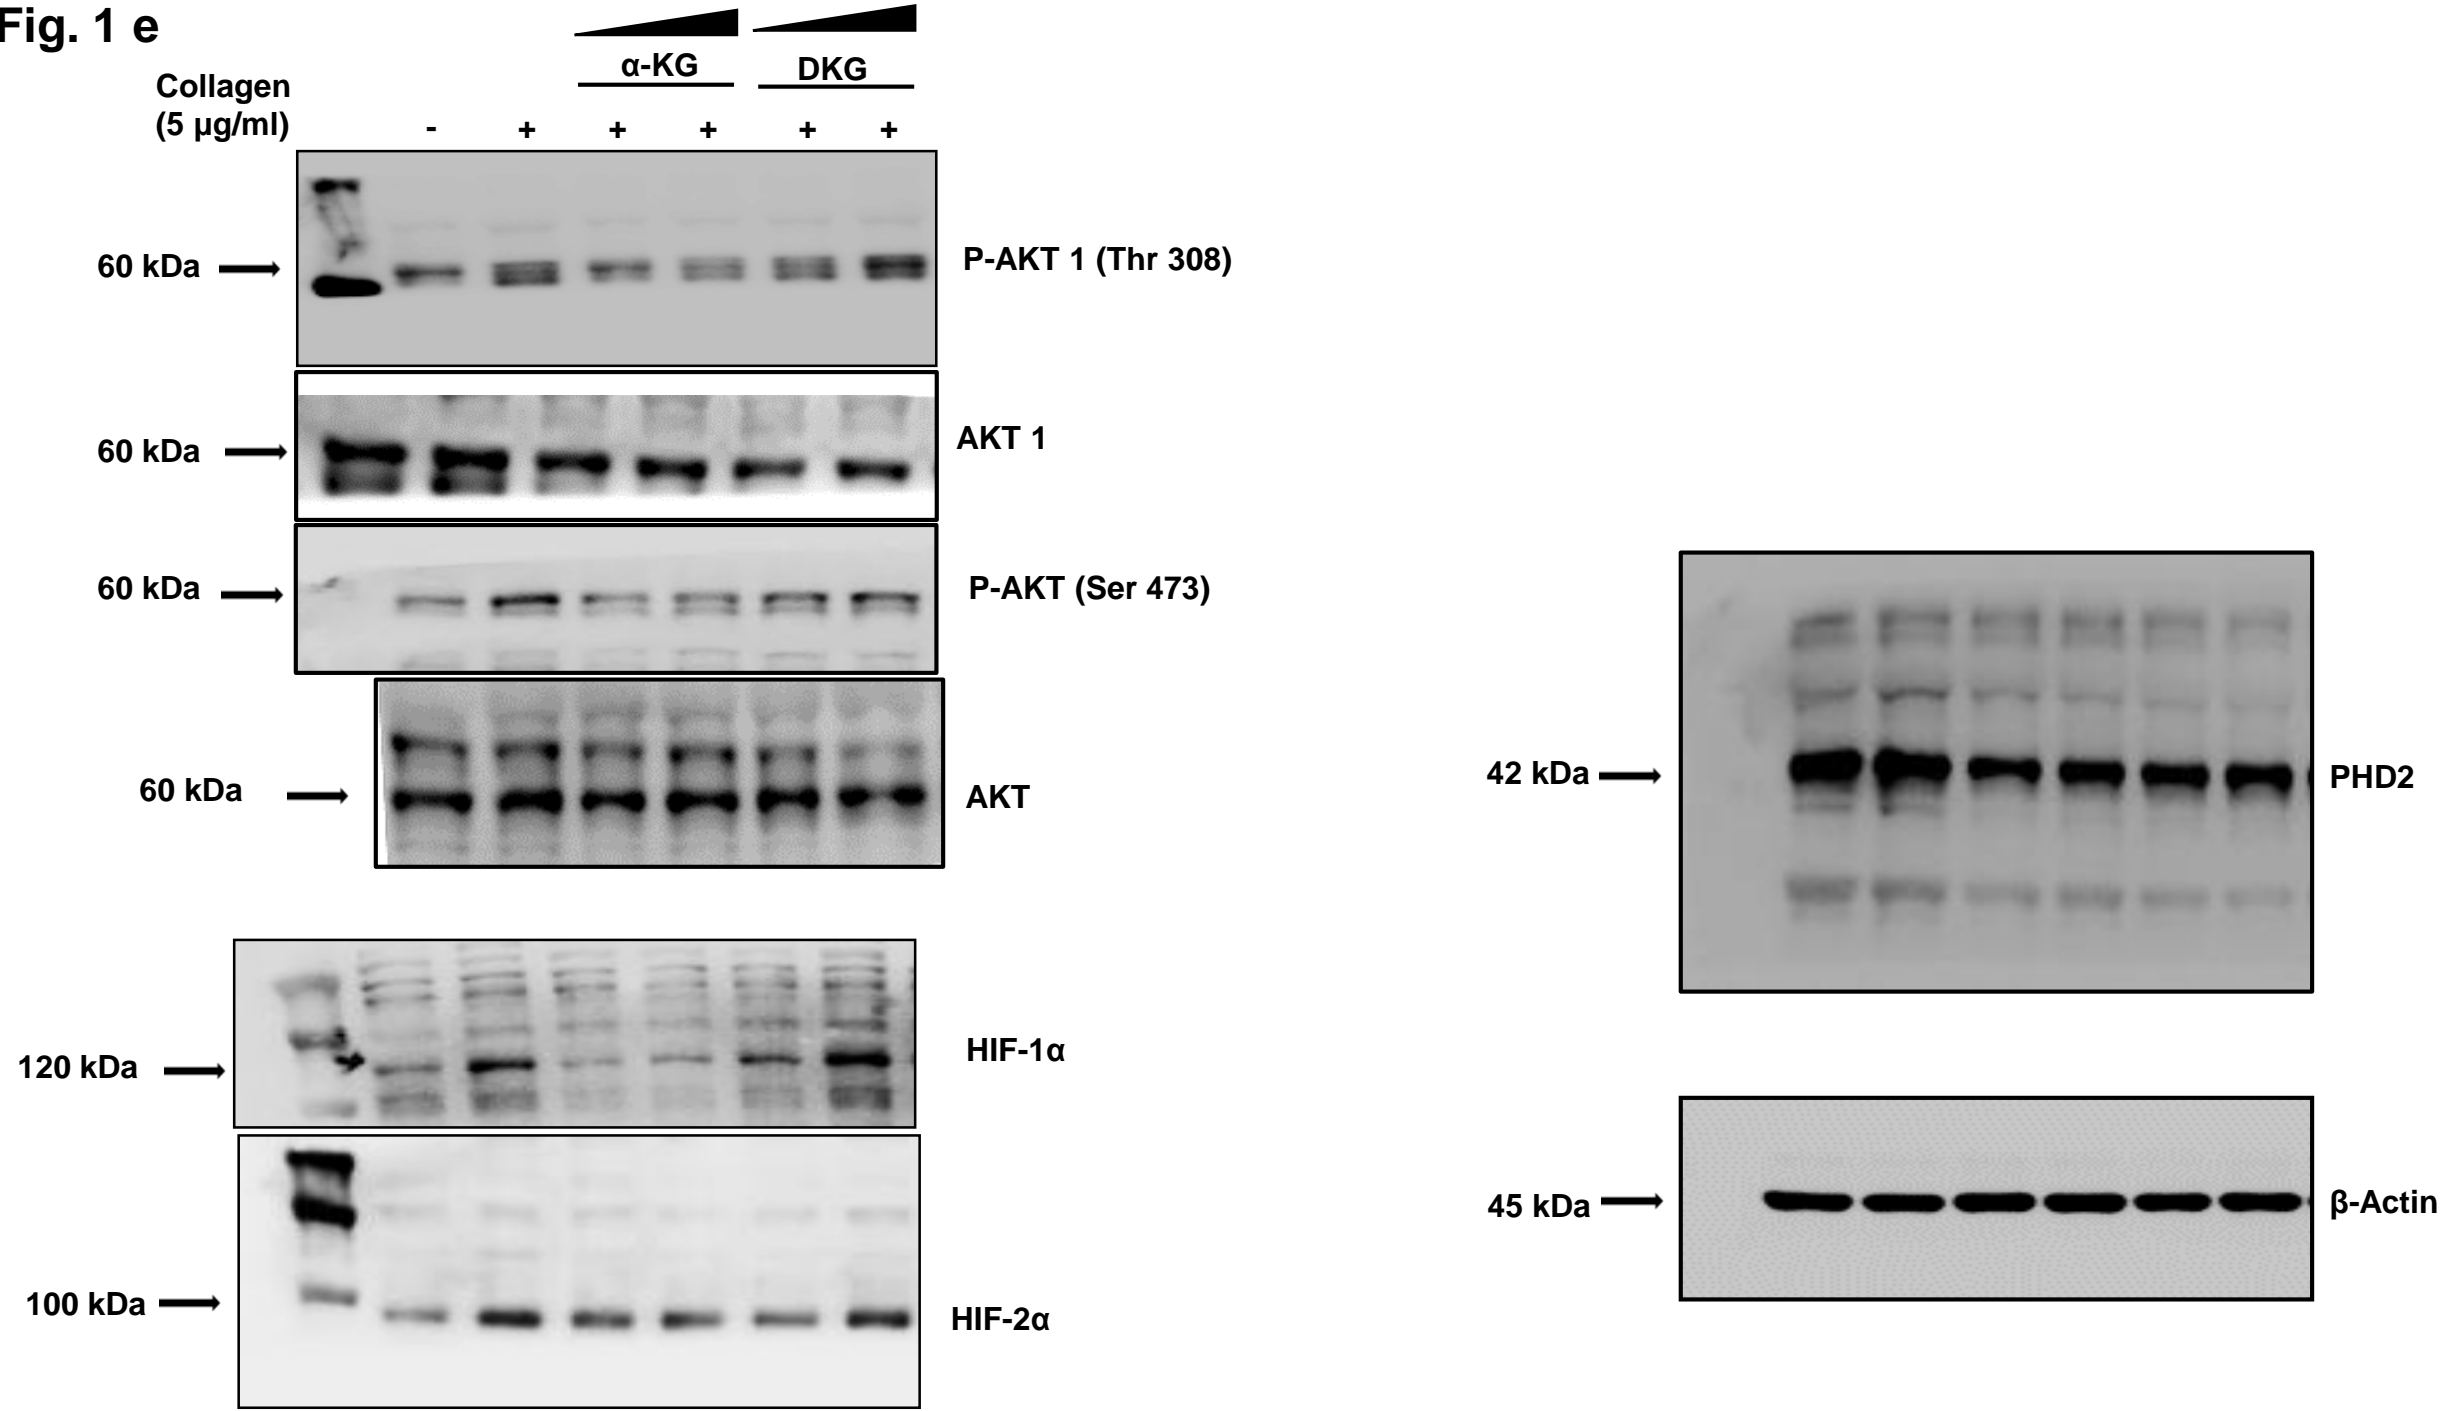



**Fig. 2 a**

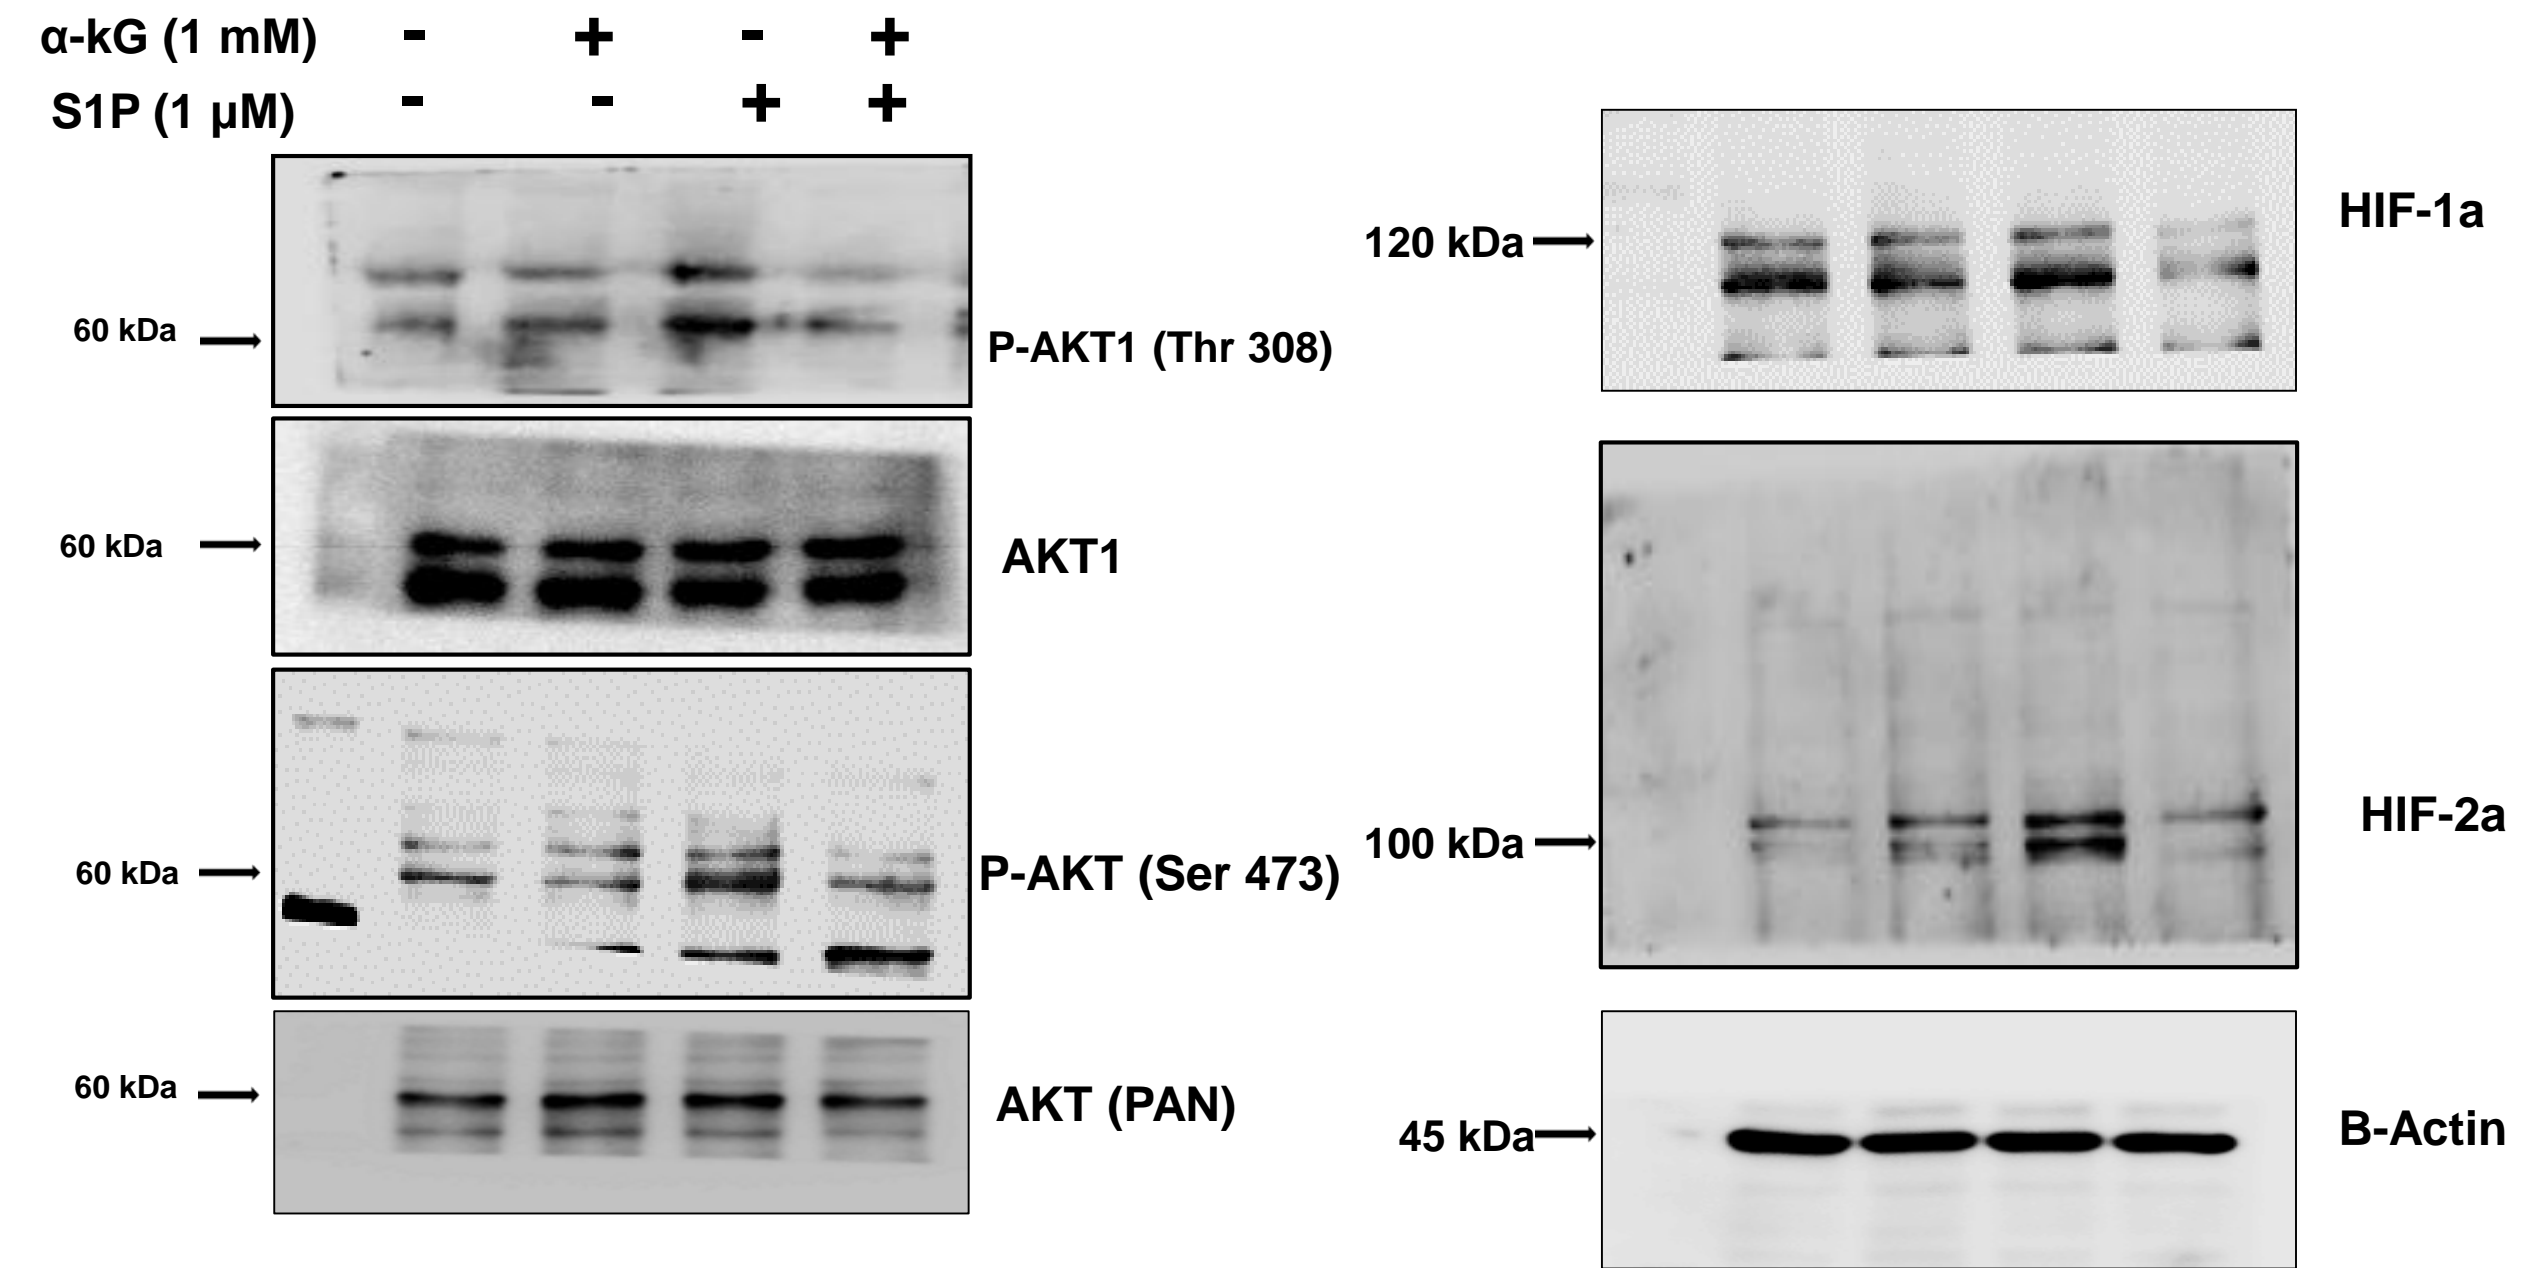

**Fig. 2 j**

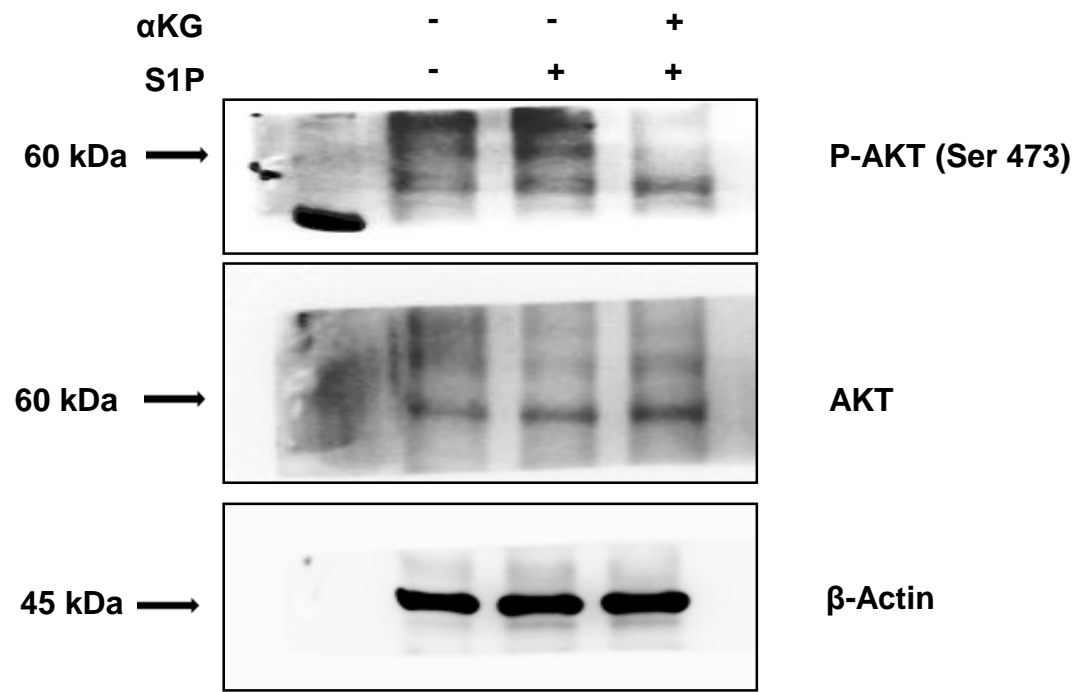

**Fig. 2 i**

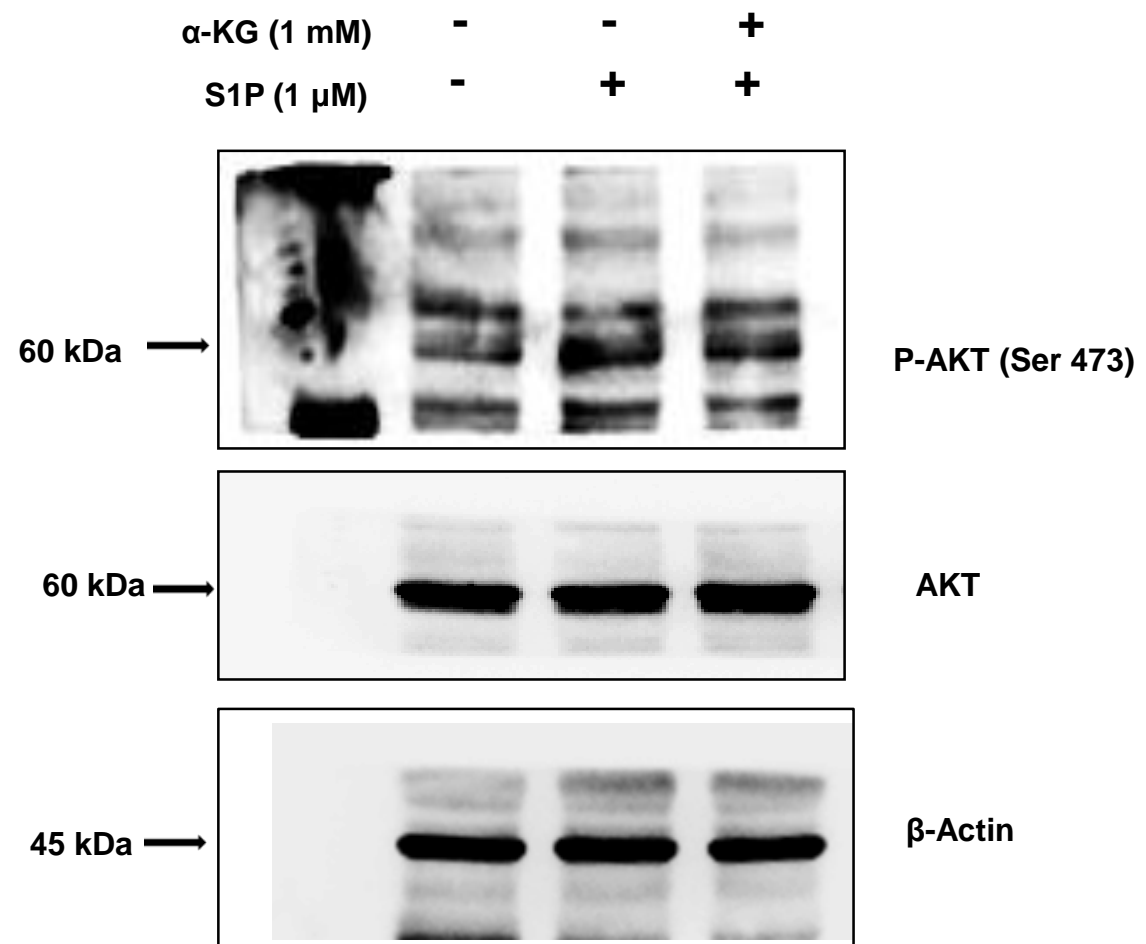

**Fig. 4 h**

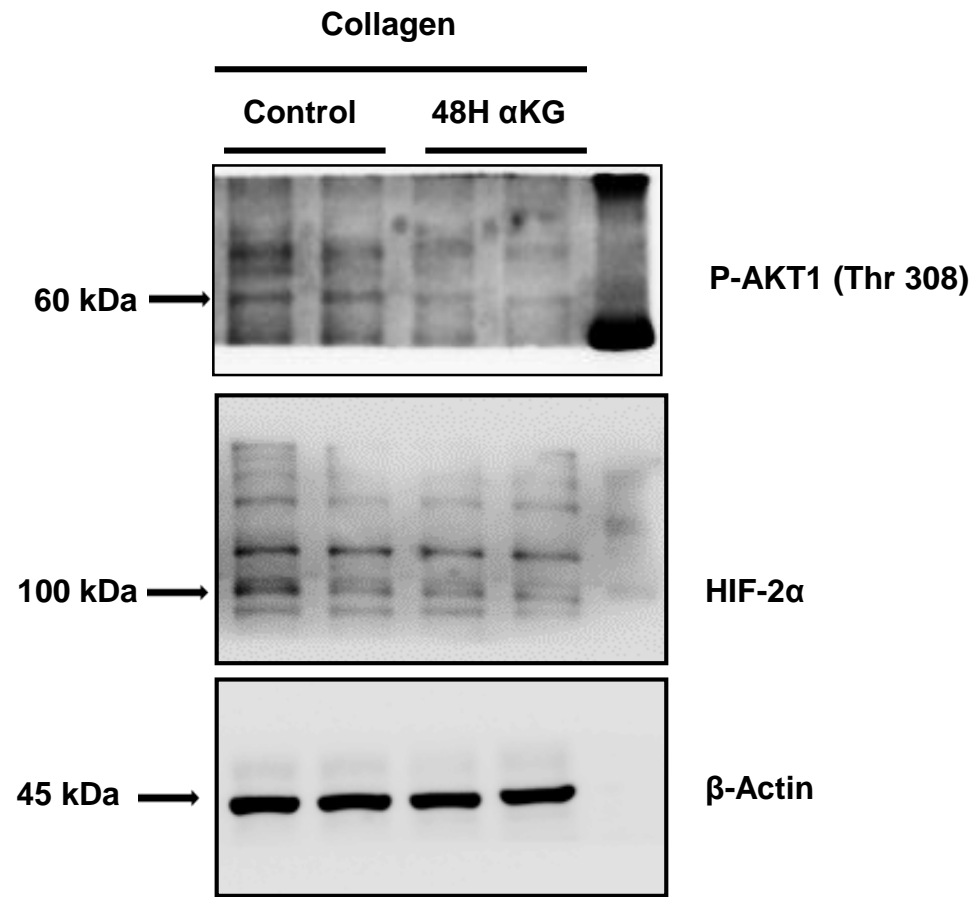



**Fig. 4 n**

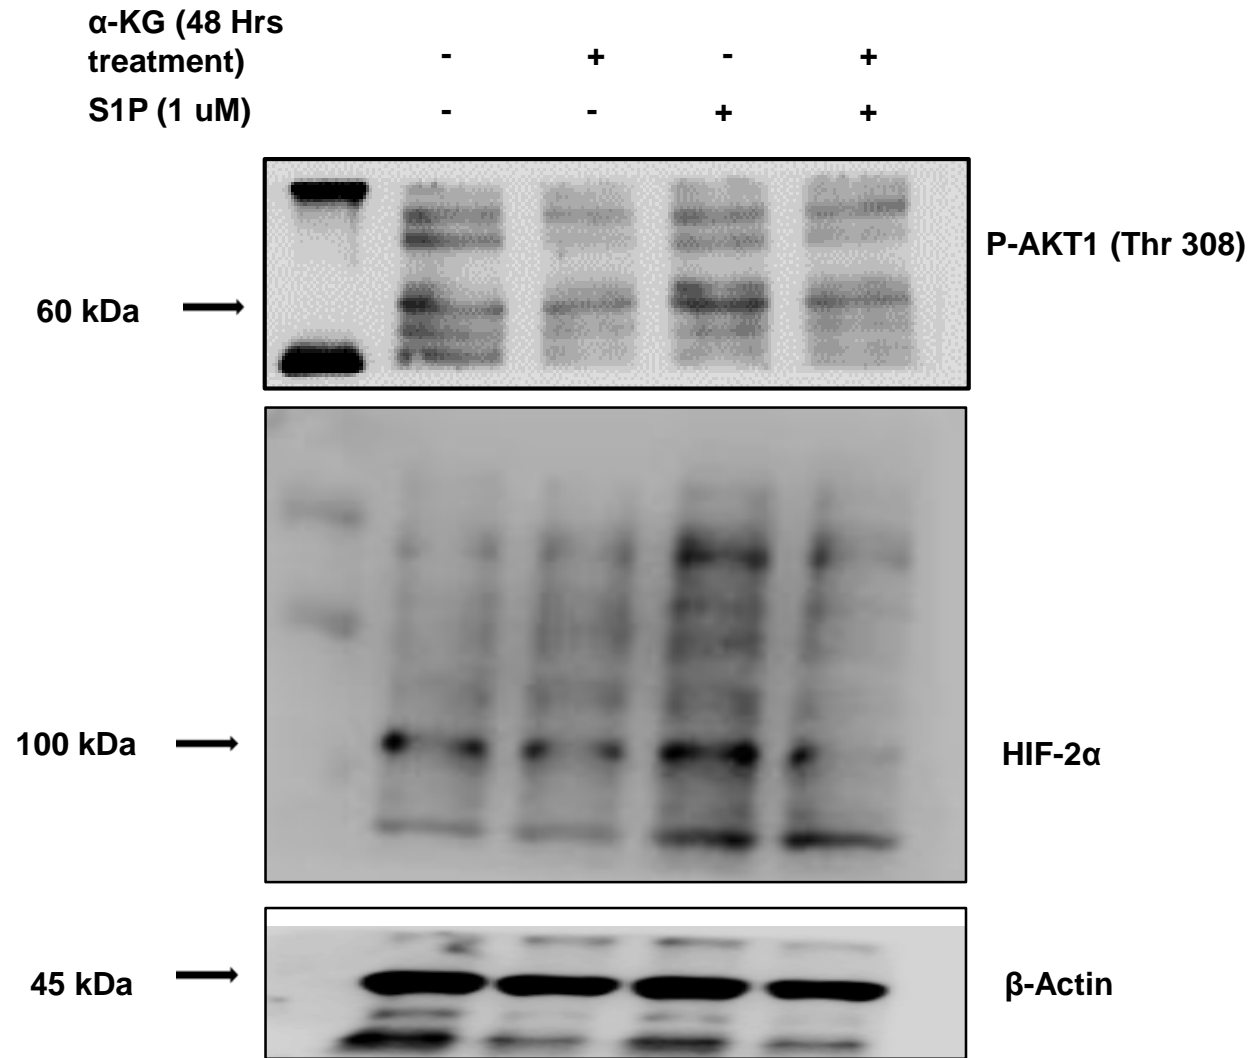

**Fig. 6 a** SARS-CoV-2 (0.1 MOI)    -            +            +  
 α-KG (1 mM)            -            -            +

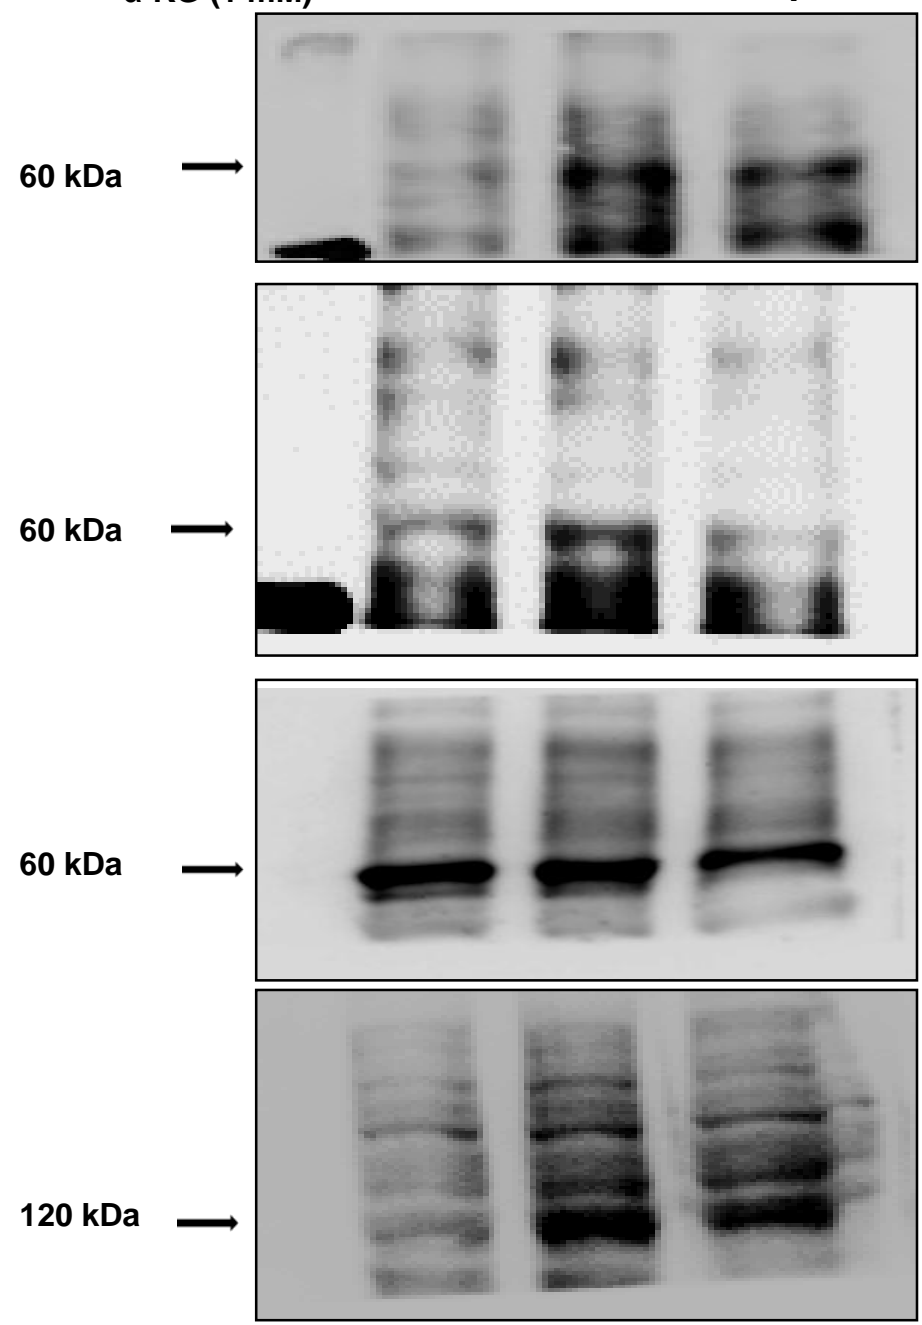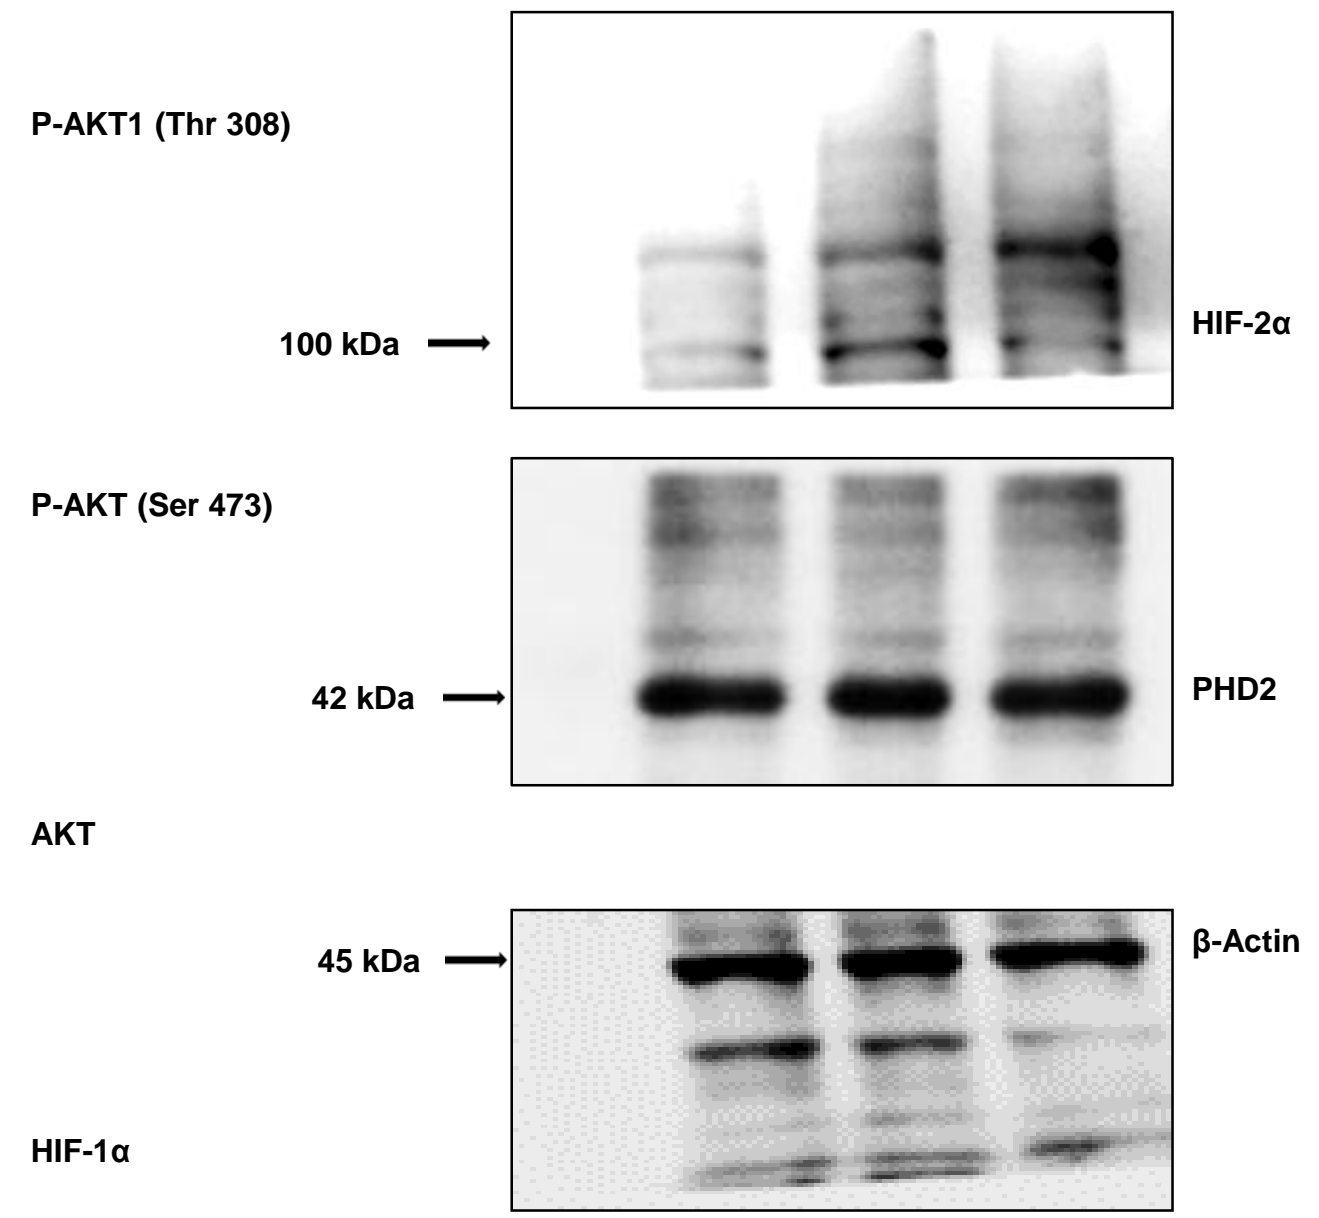

# $\alpha$ -Ketoglutarate Inhibits Thrombosis and Inflammation by Prolyl Hydroxylase-2 Mediated Inactivation of Phospho-Akt

Shrimali NM *et al.*

*Supplementary western blots: uncut blots of supplementary figures*

**Fig. S1a**

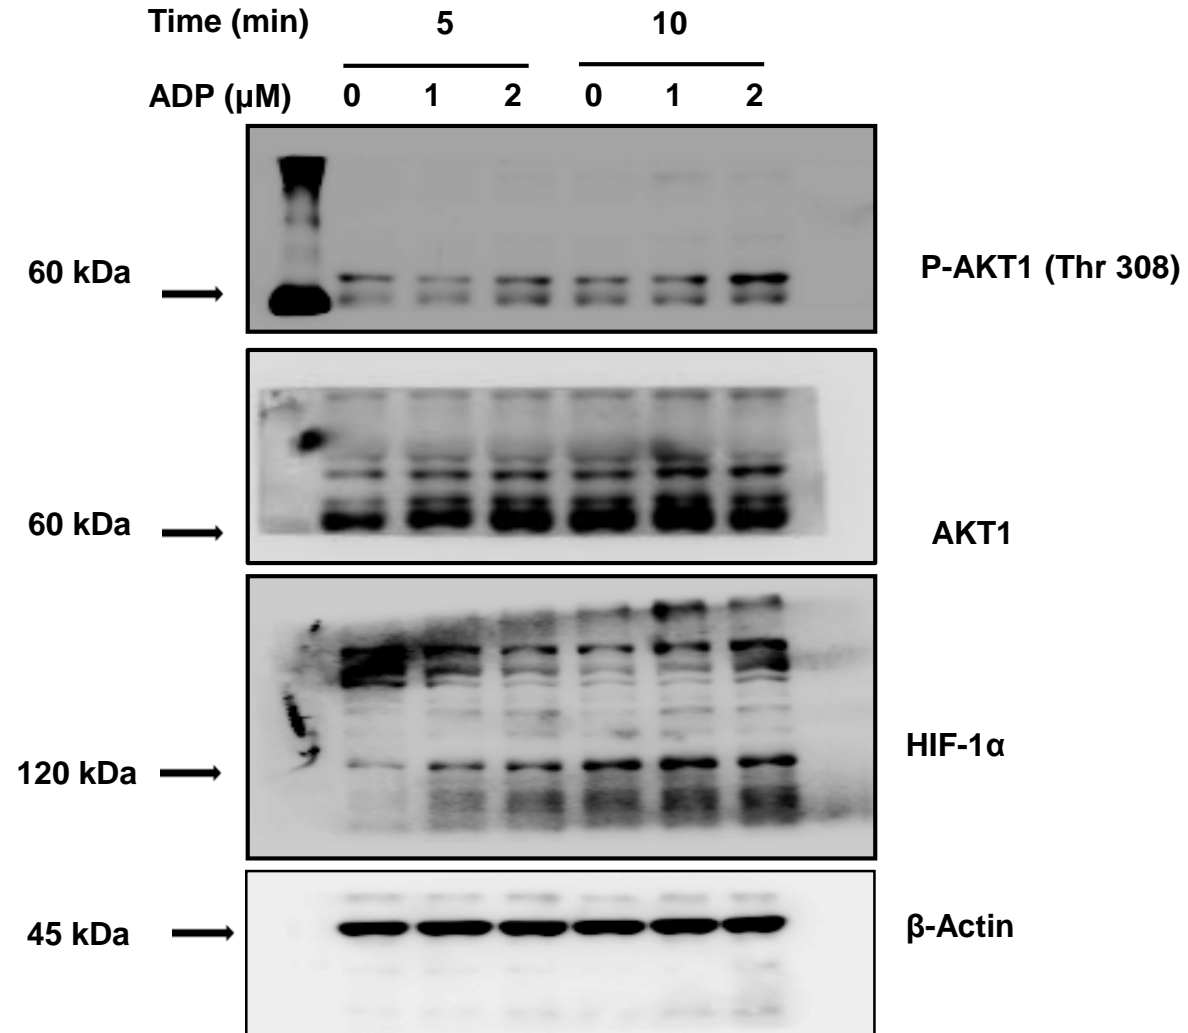

**Fig. S1b**

Collagen (5  $\mu$ g/ml)    -    +    +  
DHB (10  $\mu$ M)        -    -    +

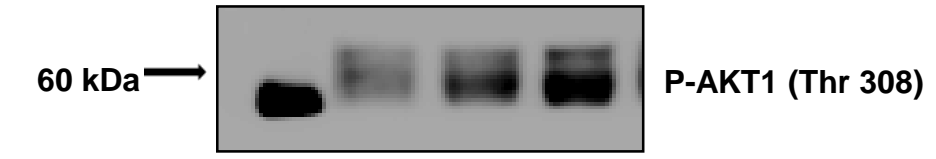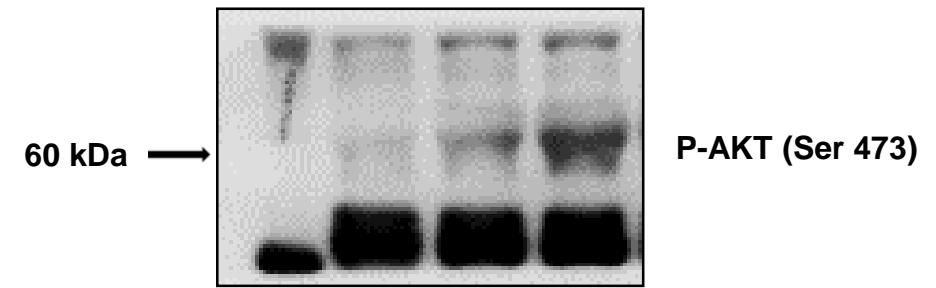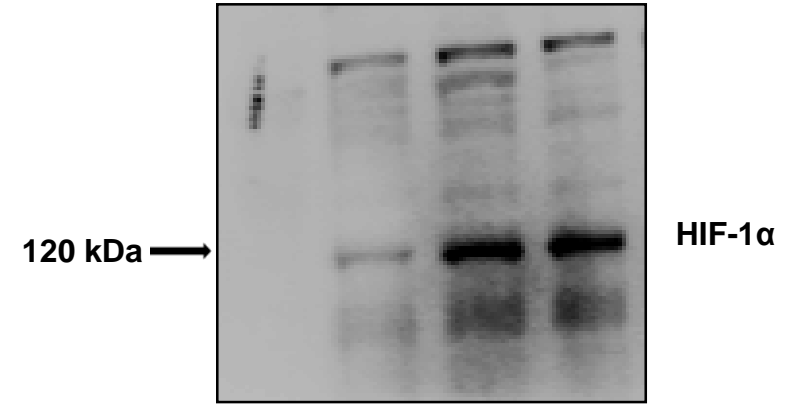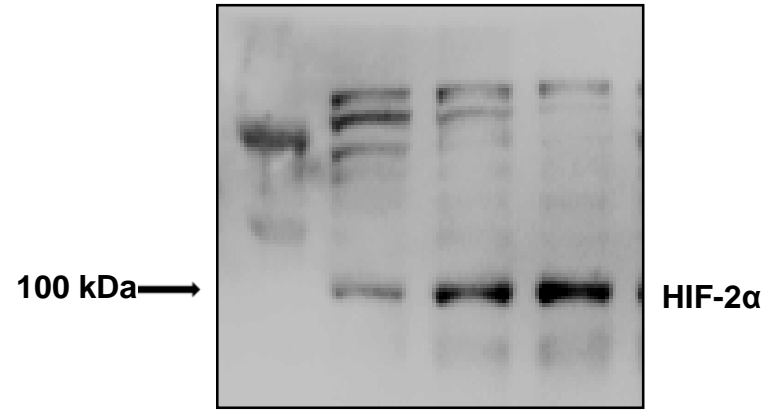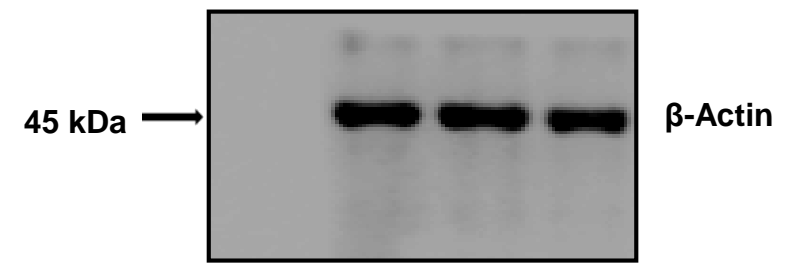

**Fig. S1c**

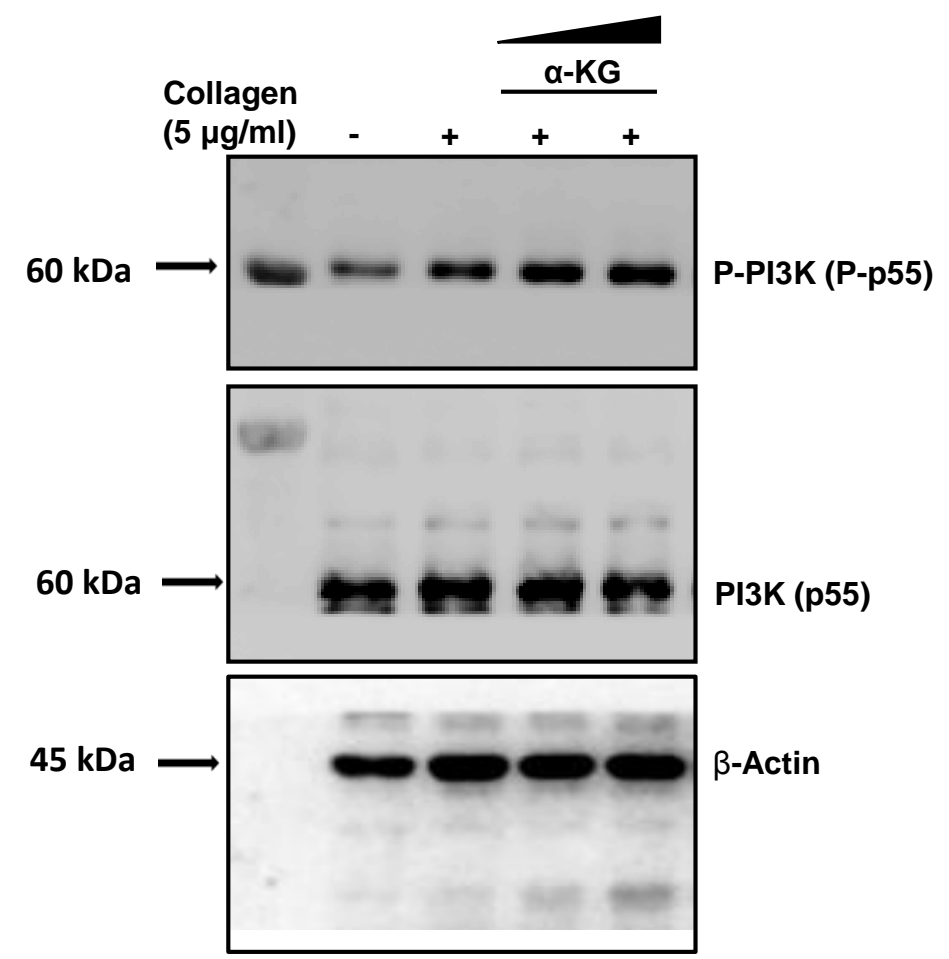

**Fig. S2**

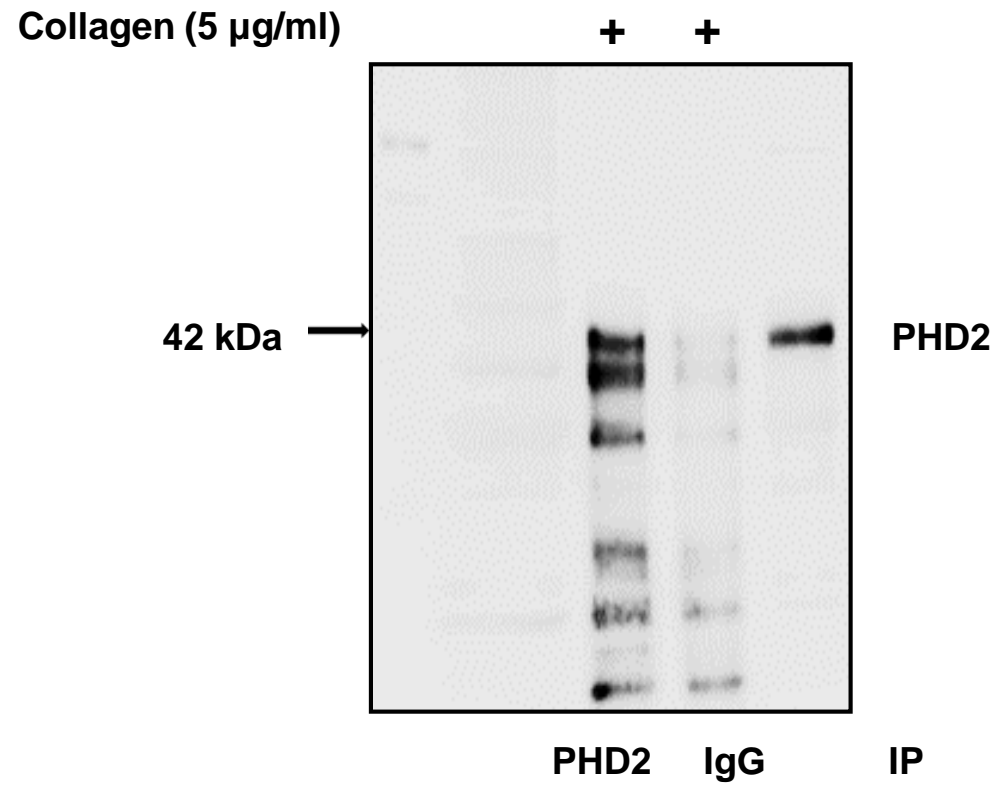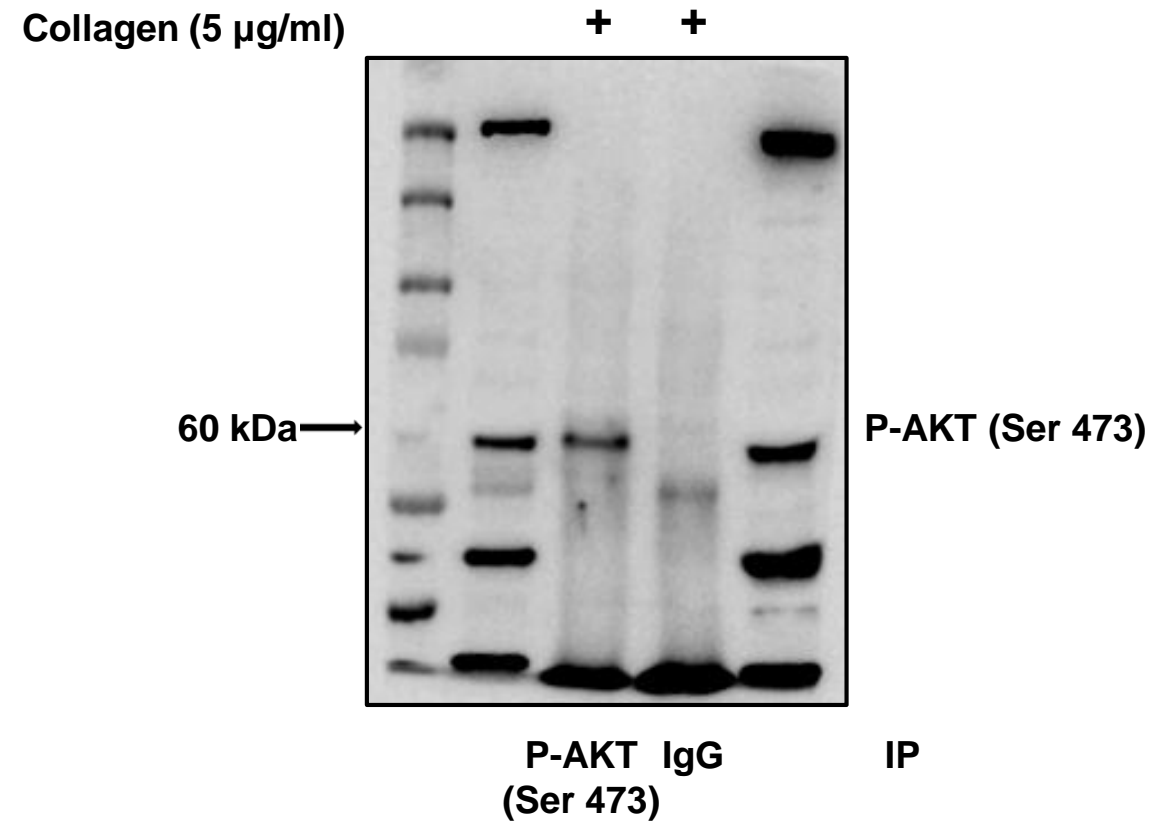

**Fig. S4c**

|                                          |   |   |   |   |   |
|------------------------------------------|---|---|---|---|---|
| <b><math>\alpha</math>-KG (0.5 mM)</b>   | - | - | + | - | + |
| <b>DKG (100 <math>\mu</math>M)</b>       | - | - | - | + | + |
| <b>Collagen (5 <math>\mu</math>g/ml)</b> | - | + | + | + | + |

60 kDa →

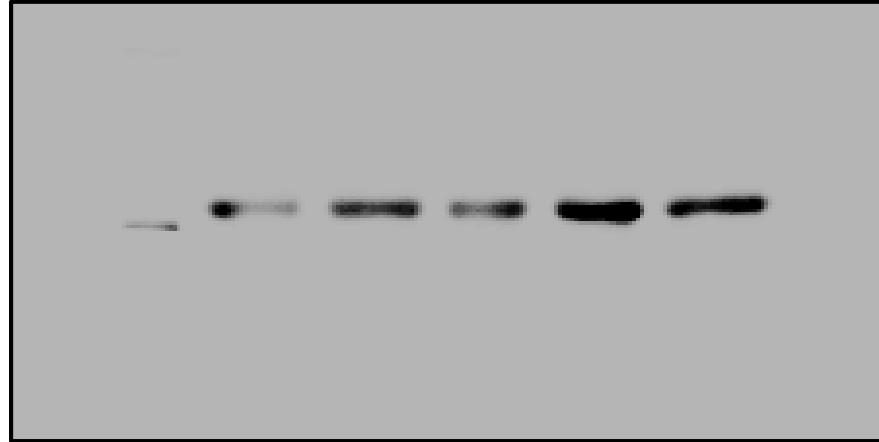

**P-AKT1 (Thr 308)**

45 kDa →

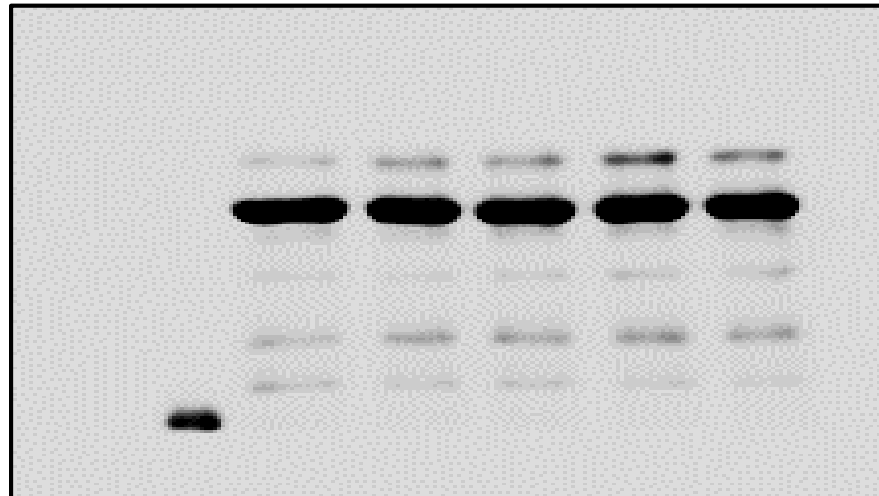

**$\beta$ -Actin**

**Fig. S5**

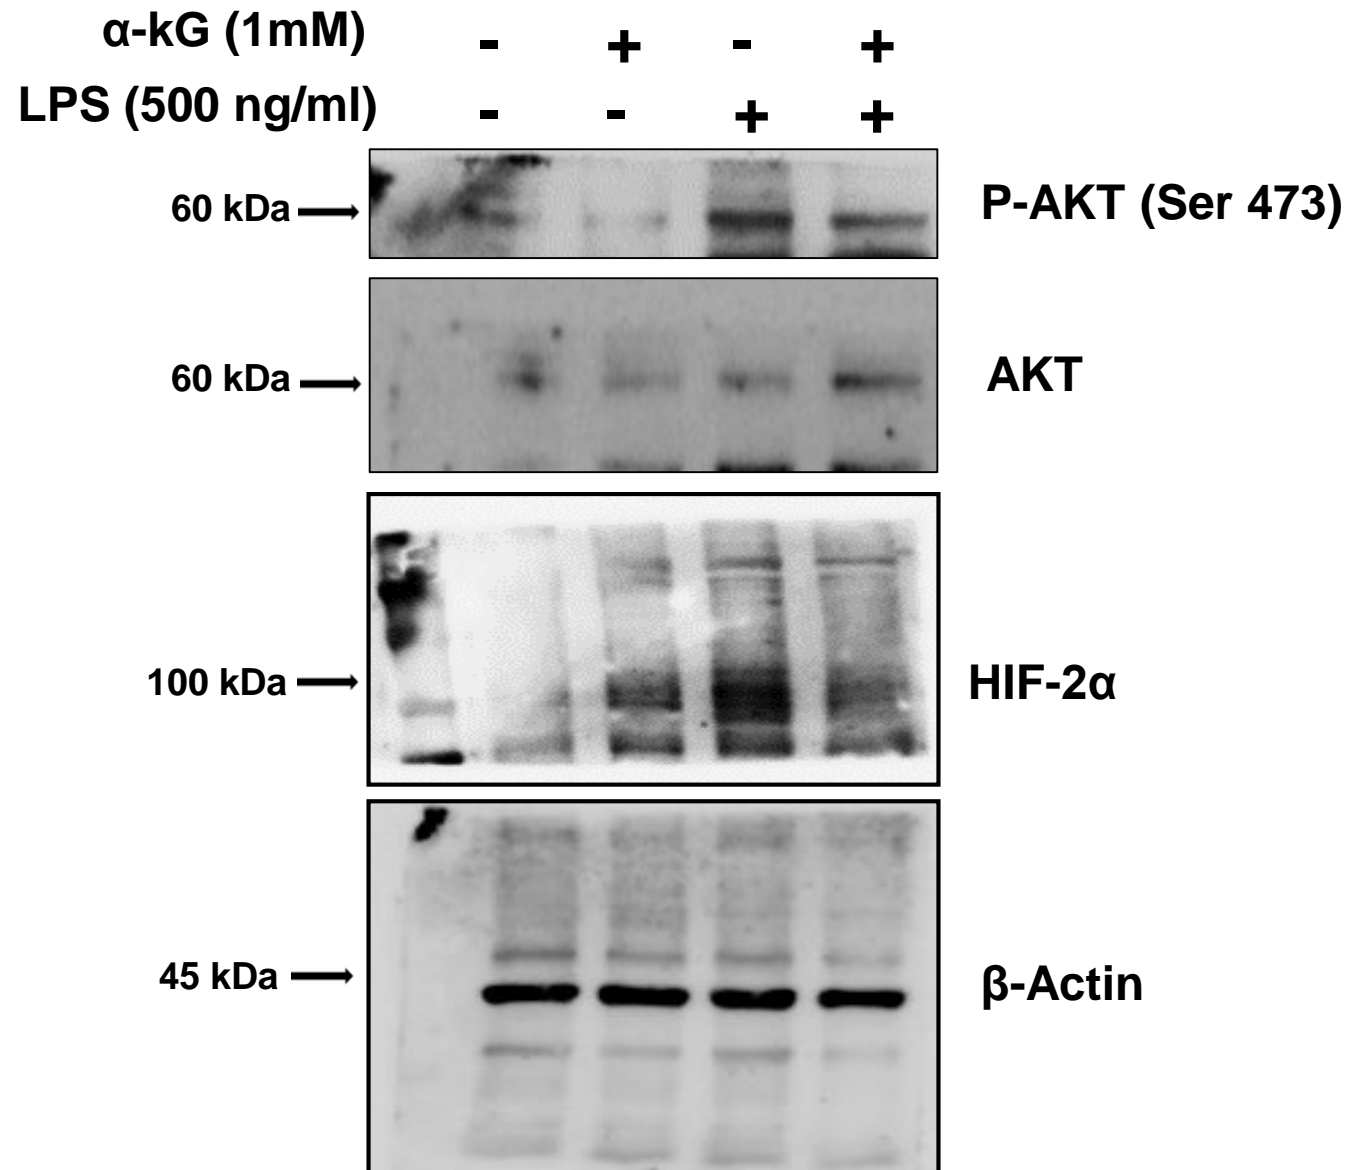



**Fig. S6**

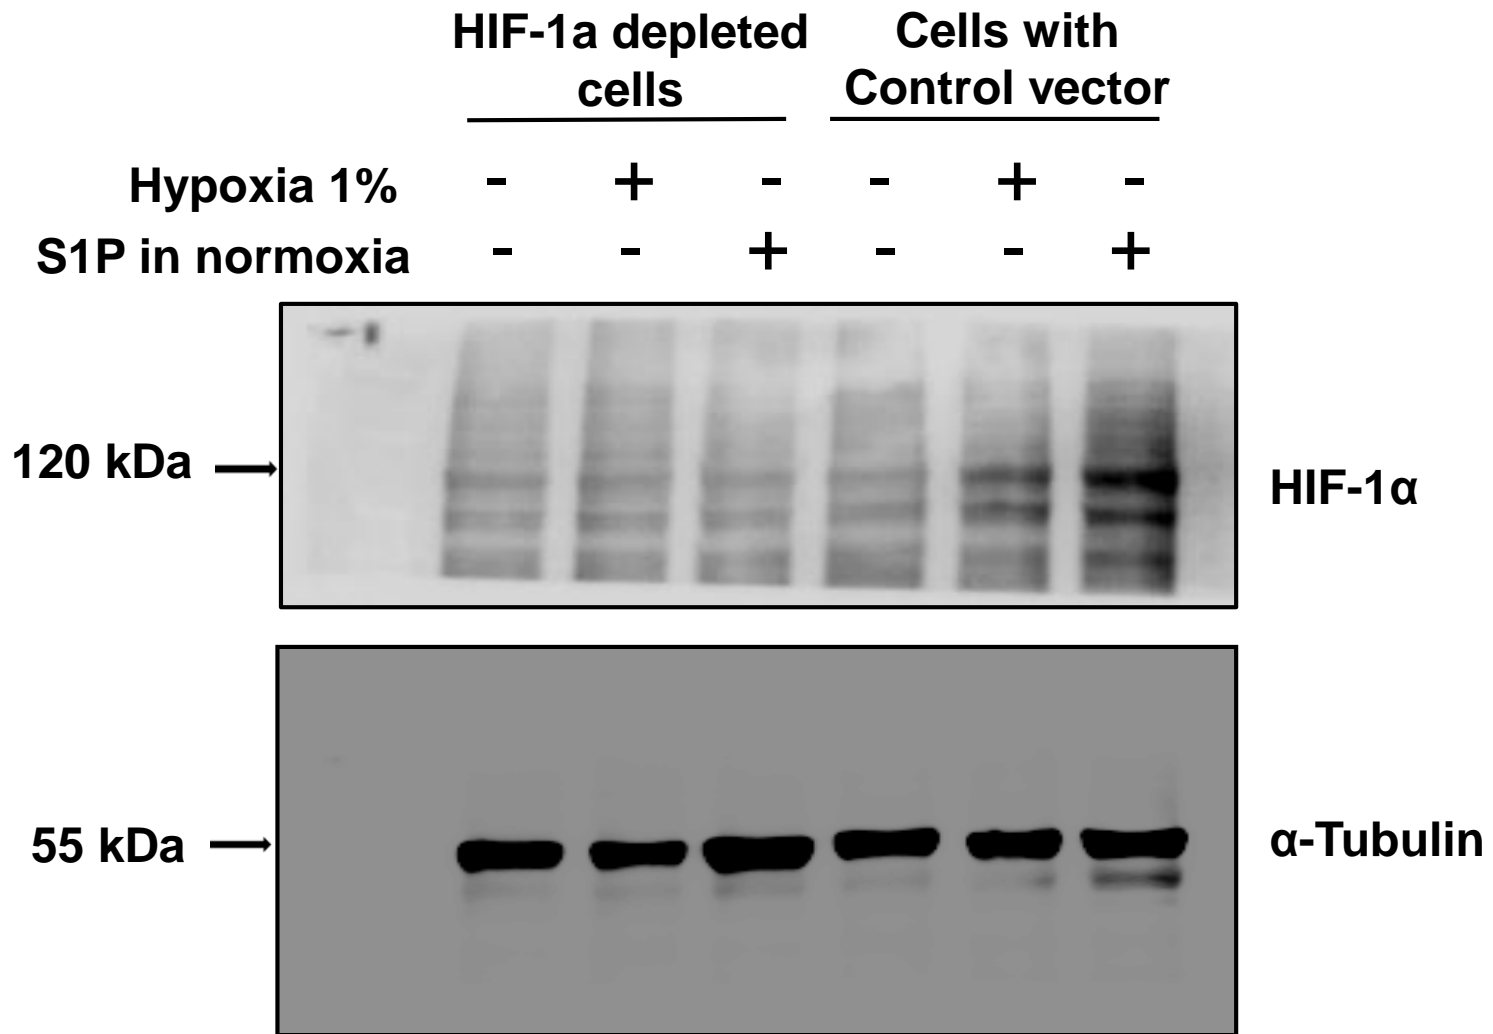

**Fig. S13**

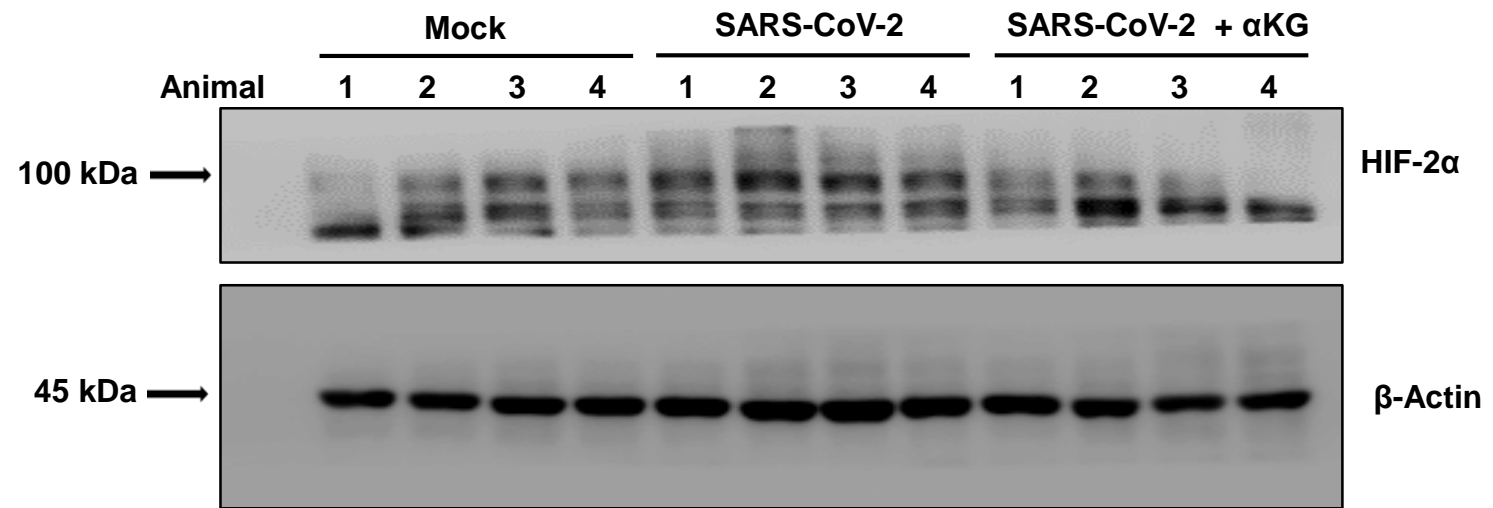

Supplement: mmc1.pdf [file mmc1.pdf]
