# Supplementary material for: α-Ketoglutarate Inhibits Thrombosis and Inflammation by Prolyl Hydroxylase-2 Mediated Inactivation of Phospho-Akt
Source: PubMed Central journal article supplement — eBioMedicine. 2021 Nov 2;73:103672. doi: 10.1016/j.ebiom.2021.103672 (PMC8579134; doi:10.1016/j.ebiom.2021.103672), 2021-11-02
Supplement: mmc2.pdf [file mmc2.pdf]

## Online Supplementary Information

### $\alpha$ -Ketoglutarate Inhibits Thrombosis and Inflammation by Prolyl Hydroxylase-2 Mediated Inactivation of Phospho-Akt.

Nishith M Shrimali, Sakshi Agarwal, Simrandeep Kaur, Sulagna Bhattacharya, Sankar Bhattacharyya, Josef T Prchal and Prasenjit Guchhait\*

\*Correspondence at prasenjit@rcb.res.in

#### Supplementary Figures and Table

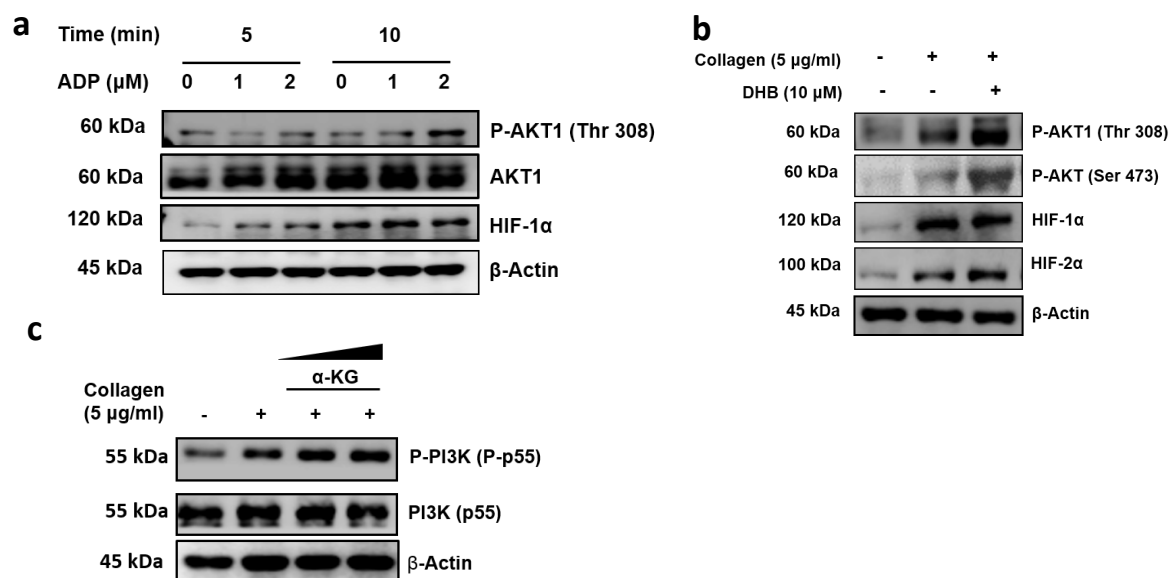

**Fig. S1. Platelet activation to ADP and DHB.** (a) Platelet-rich plasma (PRP) was incubated with ADP in a time- and concentration-dependent manner and expression of phosphorylated Akt1(Thr308), Akt1, and HIF-1 $\alpha$  were measured in platelet pellet using WB assay. Densitometry analysis shows elevated expression of P-Akt1 and HIF-1 $\alpha$  after ADP stimulation, densitometry data are mentioned in Fig. S14q-r. (b) PRP treated with collagen or DHB or both at mentioned concentration and platelet pellet was processed for WB. DHB found to increase pAkt1(Thr308), P-Akt (Ser473), HIF-1 $\alpha$  and HIF-2 $\alpha$  expression in platelets stimulated by collagen, densitometry data are mentioned in Fig. S14s-v. (c) PRP treated with collagen or  $\alpha$ KG or both and platelet pellet was processed for WB of PI3K (p55). Densitometry data shows  $\alpha$ KG do not affect collagen induced PI3K phosphorylation in platelets, densitometry data are mentioned in Fig. S14w.

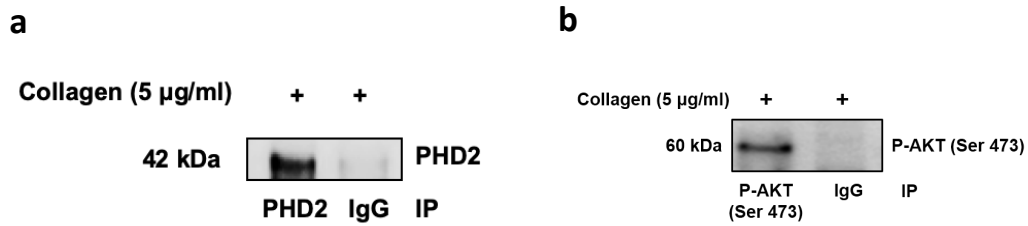

**Fig. S2. Immunoprecipitation of PHD2 and pAkt from platelet lysate.** Washed platelets were treated with collagen (5  $\mu\text{g/ml}$ ) and collected platelet pellet was lysed and immunoprecipitation was performed using protein A and protein G-Sepharose beads for PHD2 and pAkt(Ser473). Western blot images show immunoprecipitation of **(a)** PHD2 and **(b)** pAkt (Ser 473) with their respective IgG controls.

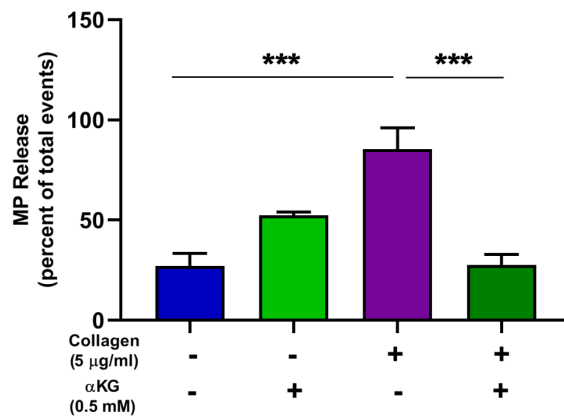

**Fig. S3. Microparticles (MP) release from platelets after  $\alpha\text{KG}$  treatment.** Washed platelets were treated with collagen (5  $\mu\text{g/ml}$ ) or  $\alpha\text{KG}$  (1 mM) or both, and collected supernatant processed for CD41a labelled microparticle analyses using flow cytometry. Bar diagram represents reduced microparticles release from  $\alpha\text{-KG}$  treated platelets. Data are mean  $\pm$  SEM from 3 independent experiments (one-way ANOVA, \*\*\* $P < 0.001$ ).

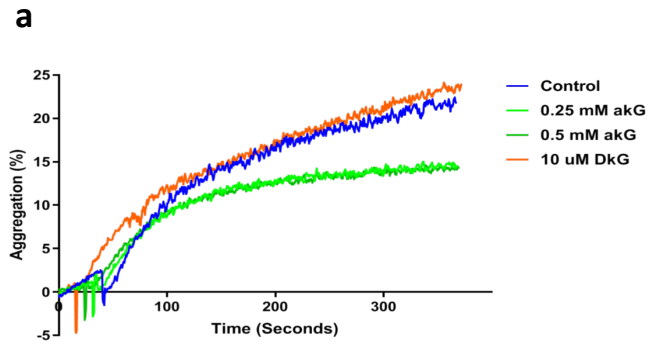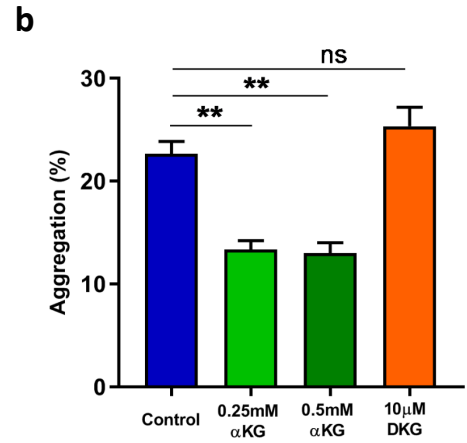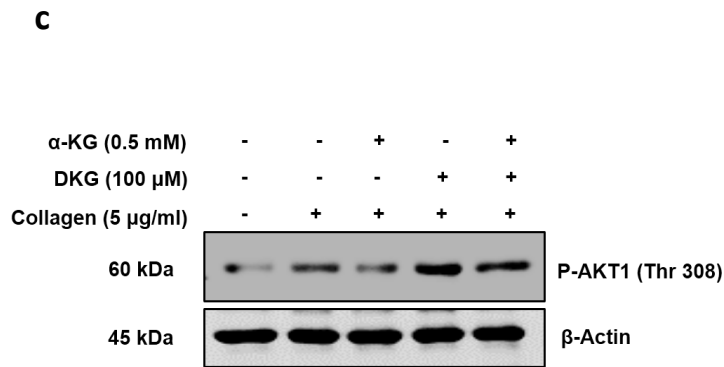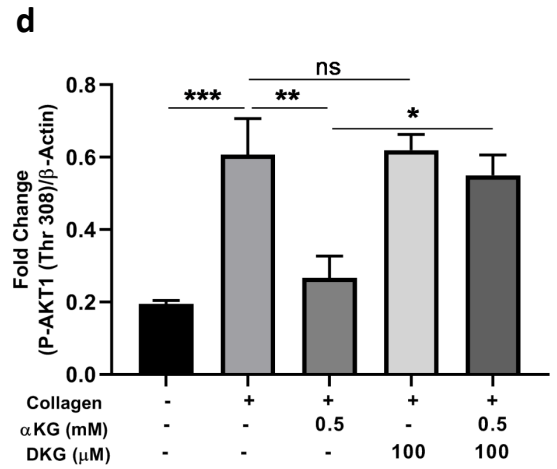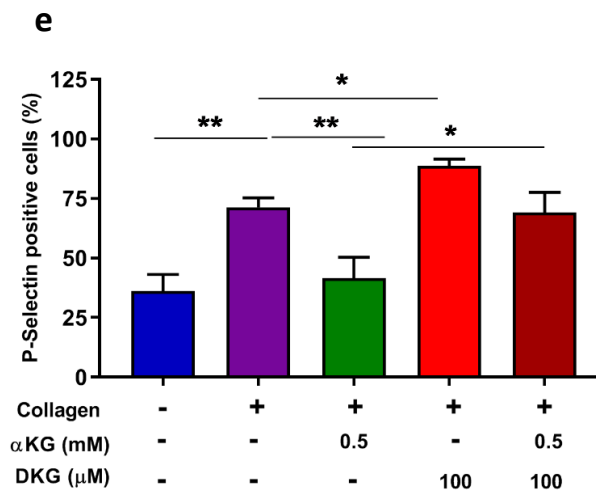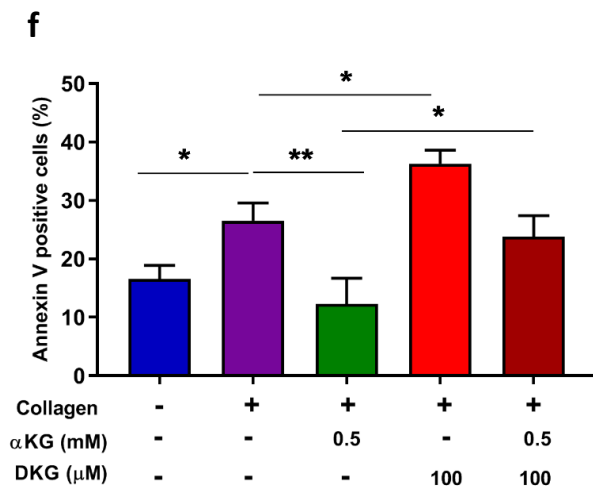

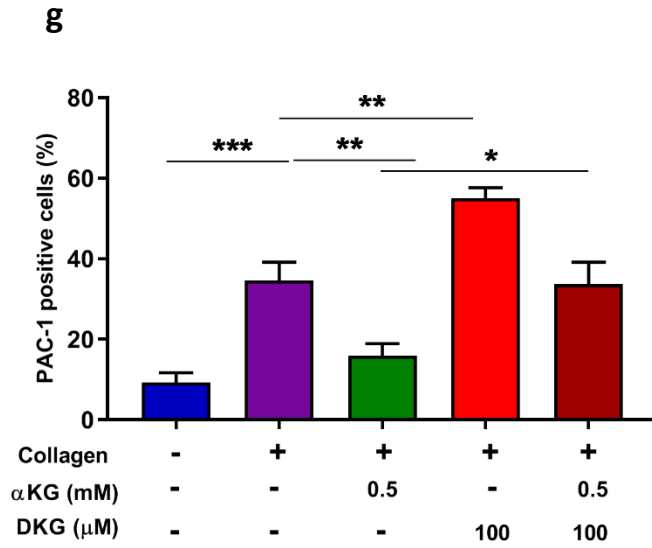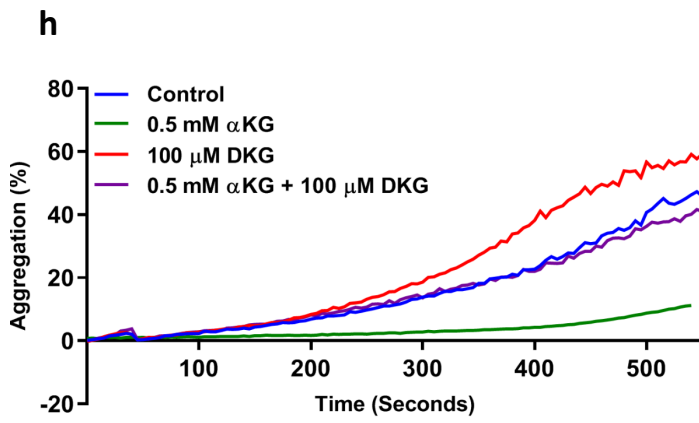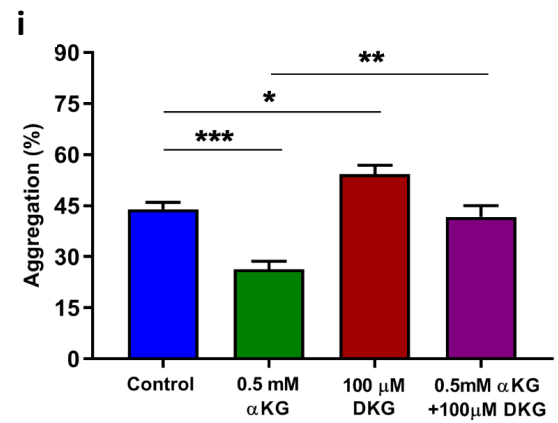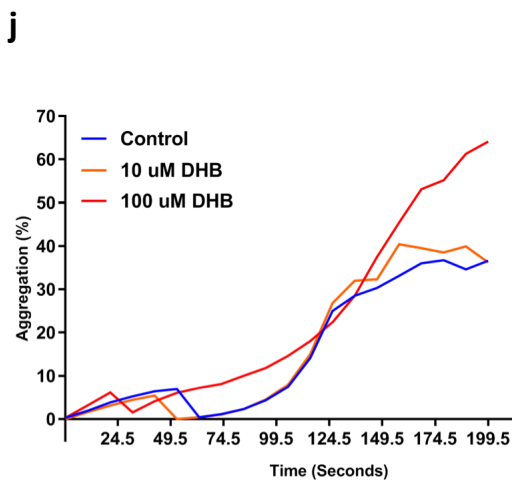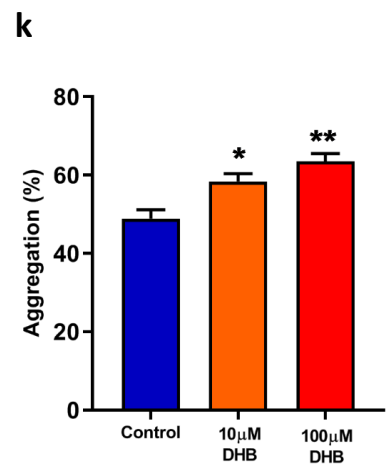

**Fig. S4. Effect of  $\alpha$ KG, DKG and DHB on platelet activation and aggregation.** (a-b) Aggregation of platelets in response to ADP was reduced after  $\alpha$ KG treatment, whereas, DKG increased it. (a) Percentage aggregation of representative assay. (b) Data from 3 independent assays. (c-i) **DKG rescues suppressed effect of  $\alpha$ KG on platelet functions.** (c) pAkt1 (Thr 308) expression. (d) Densitometry of pAkt(Thr 308) from independent assays. (e) P-Selectin, (f) Annexin V binding to PS and (g) PAC-1 binding to platelets from above experiment. (h) Percentage of platelet aggregation of a representative assay. (i) Data from independent experiments. (j-k) **Effect of DHB on platelet aggregation.** (j) Percentage of platelet aggregation from a representative assay. (k) Data from independent experiments. Data are mean  $\pm$  SEM from 3 independent experiments (one-way ANOVA, \* $P$ <0.05, \*\* $P$ <0.01, \*\*\* $P$ <0.001 and ns=non-significant).

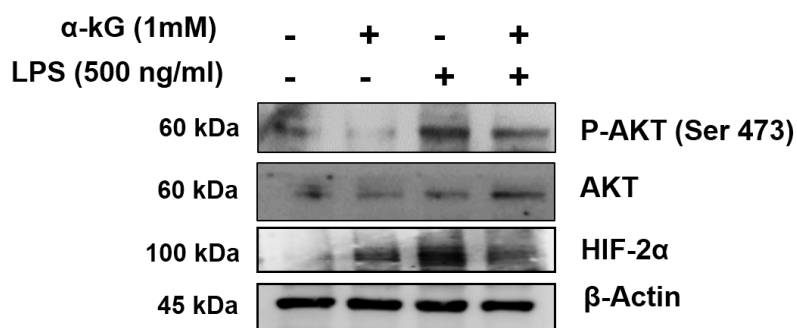

**Fig. S5. Effect of  $\alpha$ KG on LPS induced HIF-2 $\alpha$  and pAkt (Ser 473) expression.** Expression of pAkt (Ser 473) and HIF-2 $\alpha$  are reduced in primary monocytes pre-treated with  $\alpha$ -KG. Densitometry data in Fig. S14x-y.

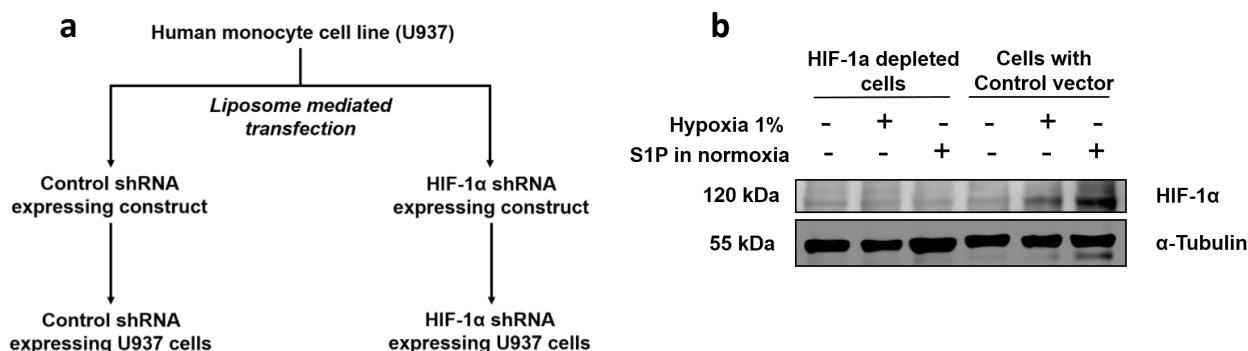

**Fig. S6. Generation of HIF-1 $\alpha$  depleted cells.** (a) Schematic protocol for depletion of endogenous HIF-1 $\alpha$  using shRNA in U937 cell line, using liposome-mediated delivery of construct. (b) HIF-1 $\alpha$  protein expression in pLKO control shRNA and HIF-1 $\alpha$  targeting constructs transfected cells with 24 hour 1% hypoxia or 1  $\mu$ M S1P stimulation.

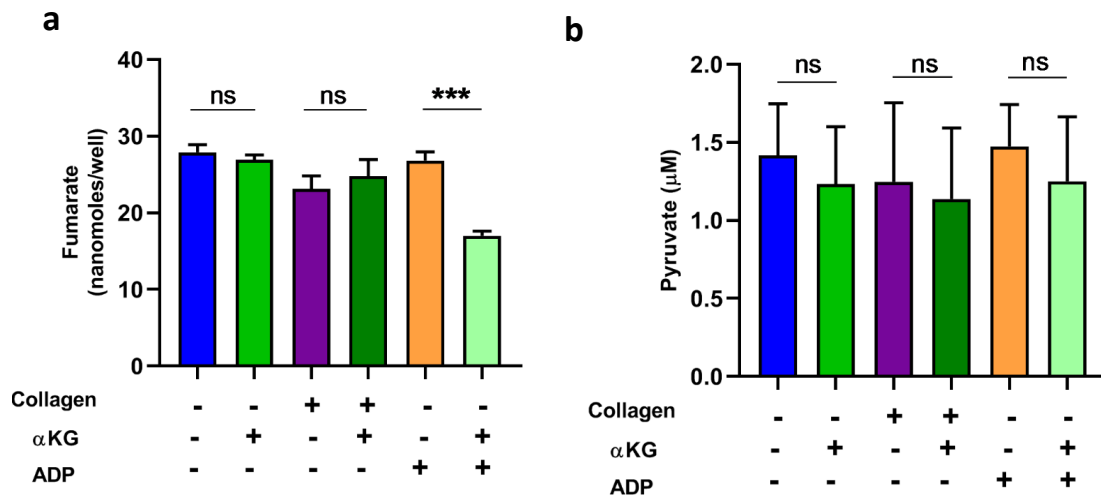

**Fig. S7. Intracellular level of fumarate and pyruvate in activated platelets after  $\alpha$ KG supplementation.** Steady state level of (a) fumarate and (b) pyruvate were estimated from platelets lysate, pre-treated with  $\alpha$ -KG and activated with collagen or ADP, as mentioned in Fig. 3. Data are mean  $\pm$  SEM from 3 independent experiments (one-way ANOVA, \*\*\* $P$ <0.001, ns=non-significant).

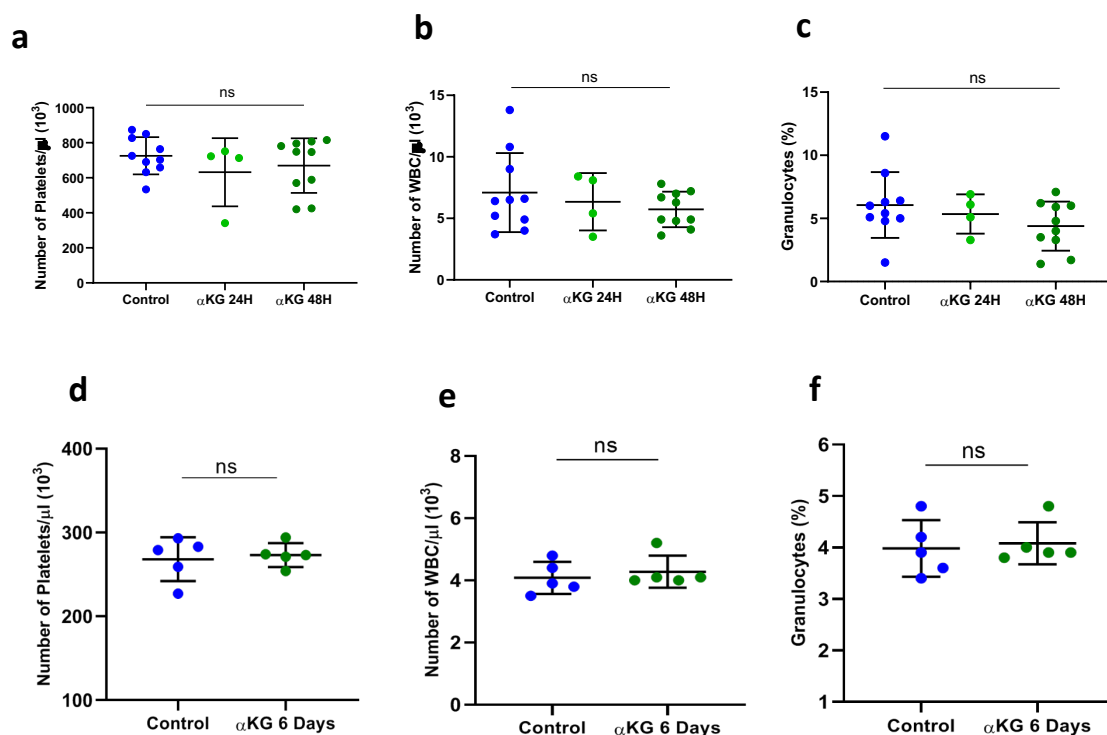

**Fig. S8. Mice and Hamster blood counts.** Count of (a) platelets, (b) WBC and (c) granulocytes determined from mice supplemented with dietary  $\alpha$ KG for 24 and 48 hours, as mentioned in Figure 4a (Kruskal Wallis test, ns=non-significant). Count of (d) platelets, (e) WBC and (f) granulocytes determined from hamsters supplemented with dietary  $\alpha$ KG for 6 days (as mentioned in Fig. 6), using Nihon Kohden's CelltacF haematology analyser (Mann Whitney test, ns=non-significant) Data are mean  $\pm$  SEM.

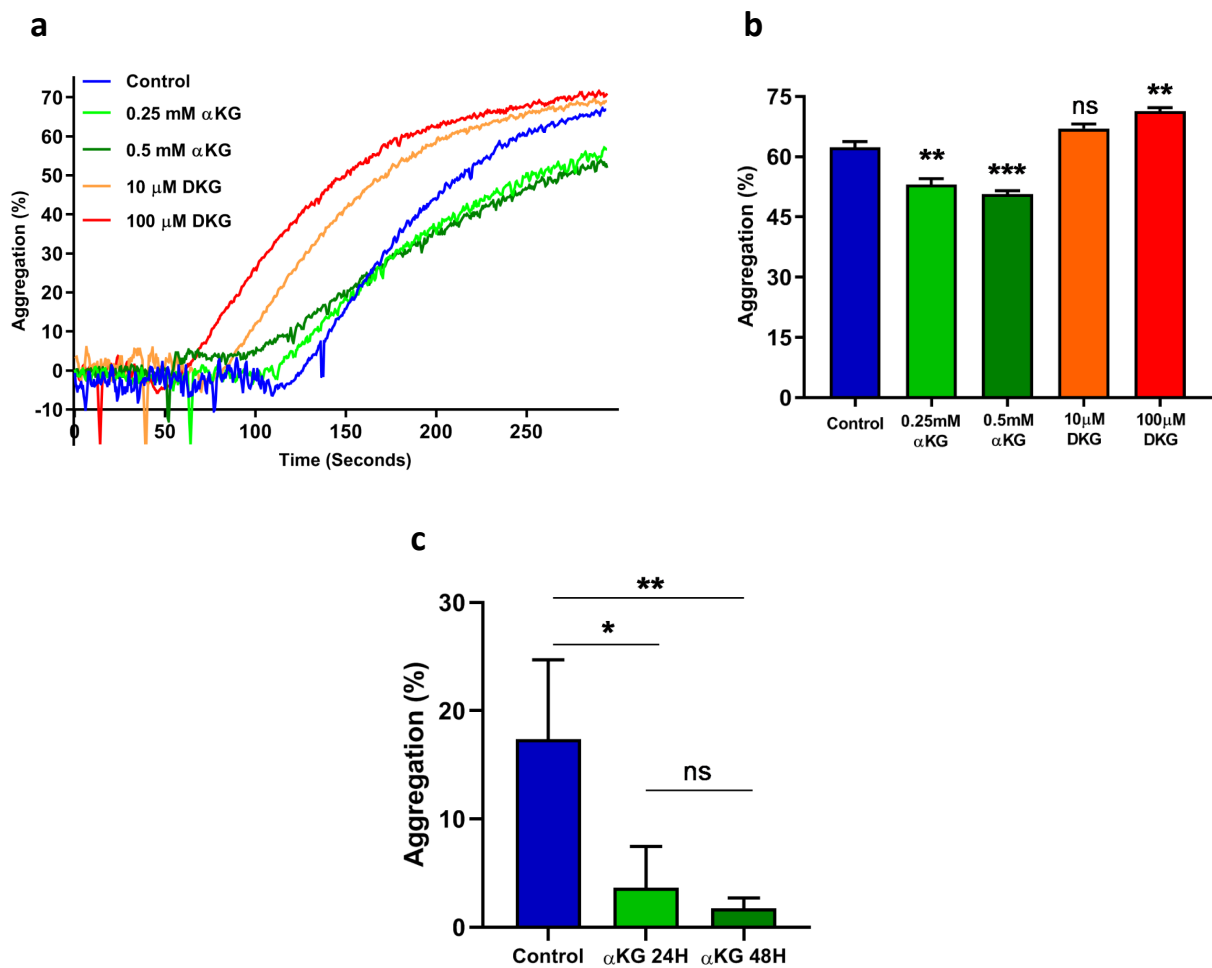

**Fig. S9. Aggregation response of mice platelets with *in vitro* and *in vivo* treatment of  $\alpha$ KG.** (a) Aggregation response of mouse PRP to collagen with/without  $\alpha$ KG or DKG treatment *in vitro*. (b) Percentage platelet aggregation. (c) Platelets from mice supplemented with dietary  $\alpha$ KG for 24 and 48 hours were stimulated with ADP and aggregation response was quantified as percentage aggregation, as mentioned in Figure 4B. Data are mean  $\pm$  SEM from 3 independent experiments (one-way ANOVA, \* $P$ <0.05, \*\* $P$ <0.01, \*\*\* $P$ <0.001, ns=non-significant).

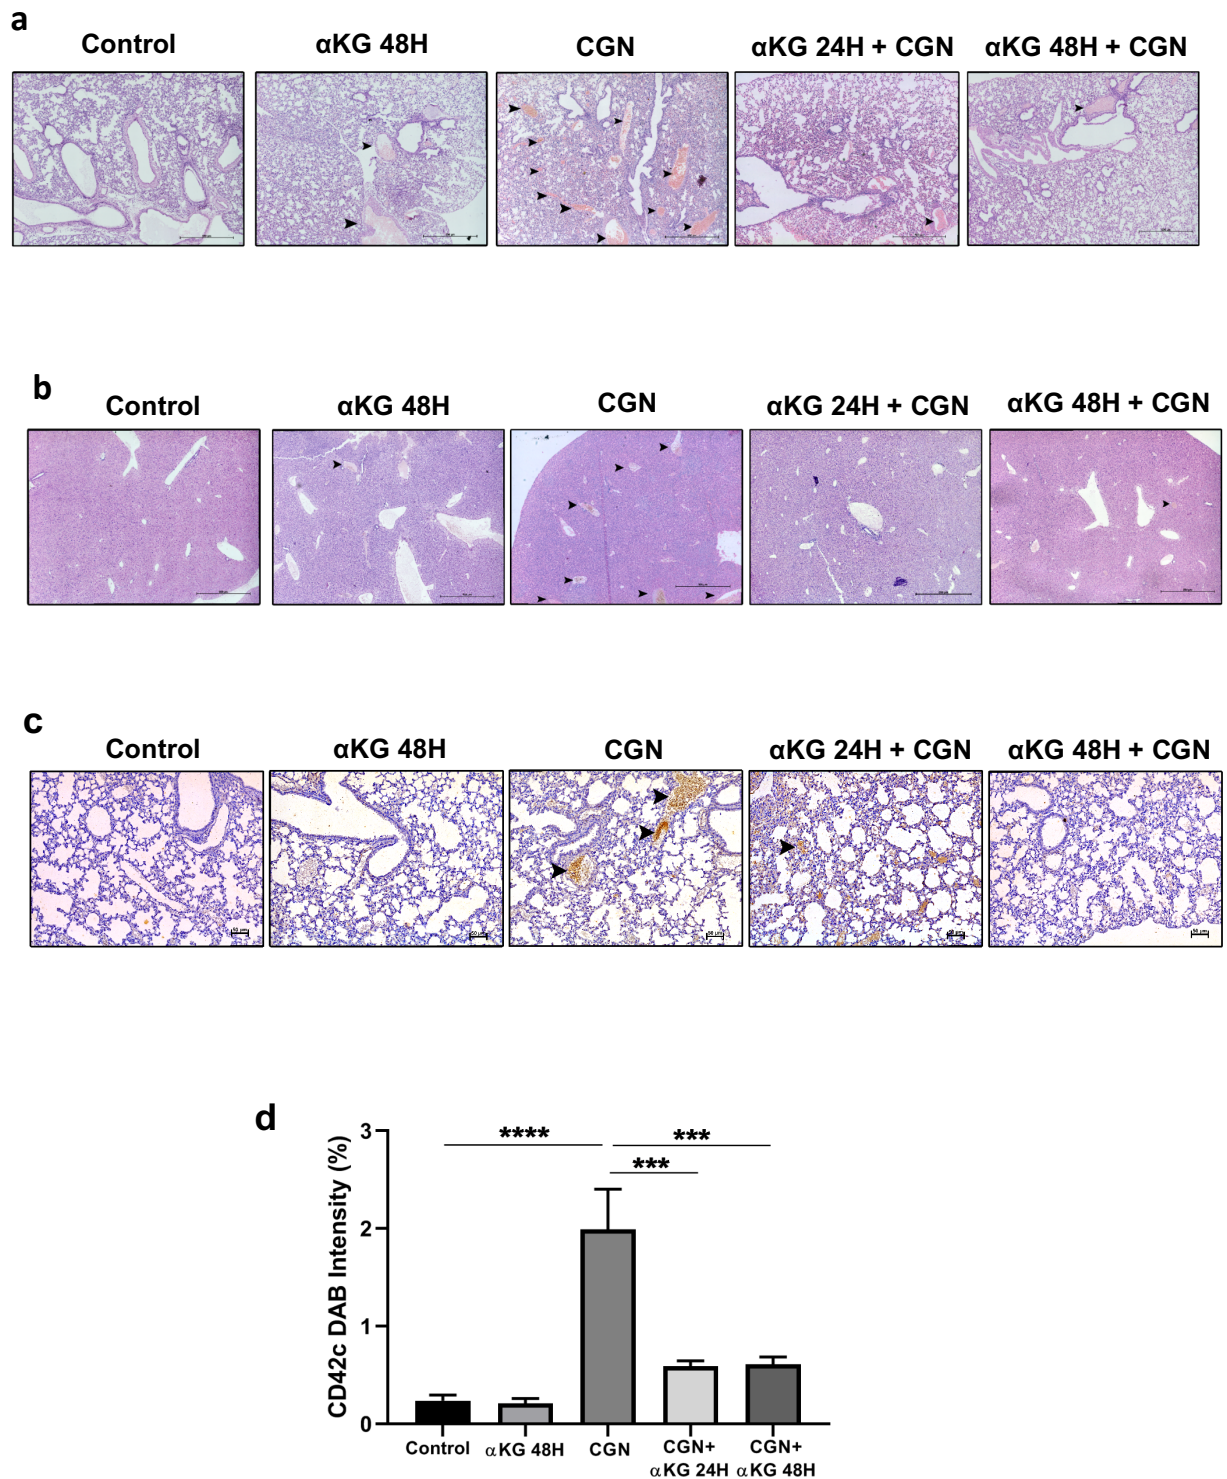

**Fig. S10. Dietary  $\alpha$ KG supplementation reduces lung and liver thrombosis in mice.** H&E staining of mice (a) lung and (b) liver showing reduction of carrageenan induced thrombosis by dietary  $\alpha$ -KG supplementation. Scale bar 500  $\mu$ m. Similar MT staining data are mentioned in Fig. 5d. Treatment details are mentioned in Fig. 5a. (c) Mouse lung section from Fig. 5d were processed for IHC using CD42c antibody. Arrows indicate platelets in thrombus. Scale bar 50  $\mu$ m. (d) Platelet accumulation in lung thrombus was measured by quantifying DAB intensity (n=8). Data are mean  $\pm$  SEM (one-way ANOVA, \*\*\* $P$ <0.001 and \*\*\*\*  $P$ <0.0001).



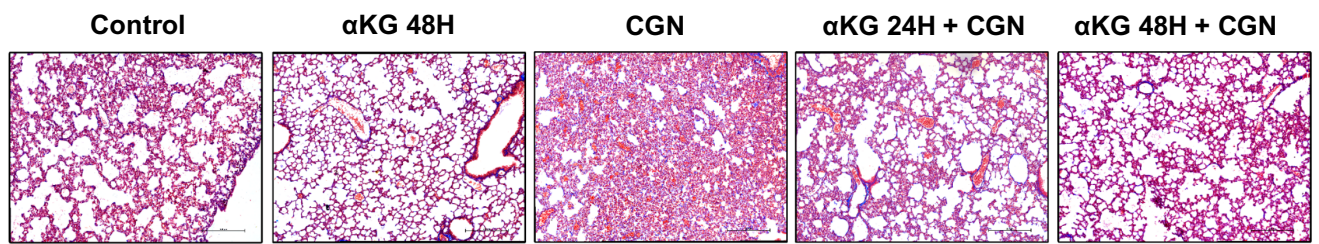

**Fig. S11. Dietary  $\alpha$ KG supplementation reduces inflammation in mice lung.** Masson's trichrome (MT) staining of mice lung showing reduction of leukocyte infiltration, as the marker of inflammation, after dietary  $\alpha$ KG supplementation in carrageenan-treated mice. Scale bar 500  $\mu$ m. Similar H&E staining data are mentioned in Fig. 5h.

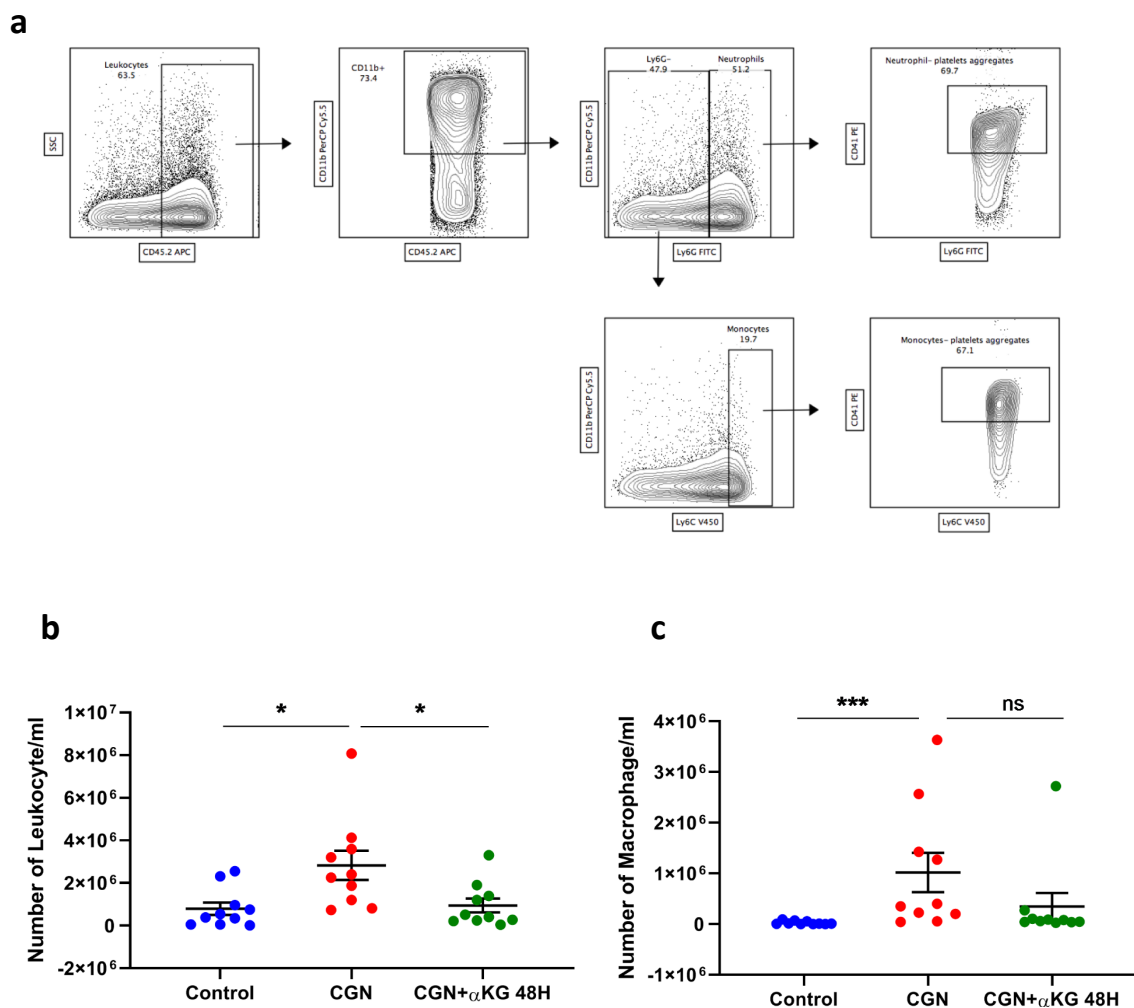

**Fig. S12. Gating strategy for immune cells from mice peritoneal lavage fluid.** Peritoneal lavage fluid collected from carrageenan treated mice was used to determine number of cells using flow cytometry. **(a)** Represents gating strategy used for determining different cell types. **(b)** Number of leukocytes and **(c)** macrophages in Peritoneal lavage fluid. Data are mean  $\pm$  SEM. (Kruskal Wallis test, \* $P$ <0.05, \*\*\* $P$ <0.001, ns=non-significant). Additional data for Fig. 5n-t.

**a**

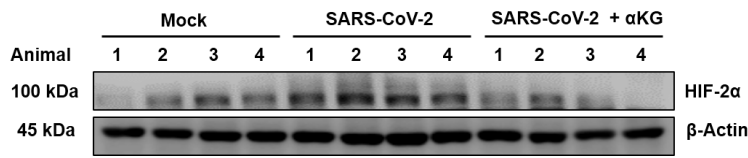

**b**

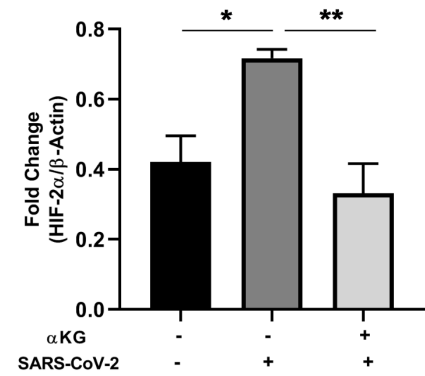

**Fig. S13. HIF-2α expression in lung tissue of hamsters infected with SARS-CoV-2. (a)** Immunoblots showing reduced expression of HIF2α in lung tissue lysates of hamsters treated with SARS-CoV-2 and supplemented with αKG compared to SARS-CoV-2 treated hamsters. **(b)** Densitometry data of immunoblots from above treatments (n=9 in each group). Data are mean ± SEM (one-way ANOVA, \* $P < 0.05$ , \*\* $P < 0.01$ ).

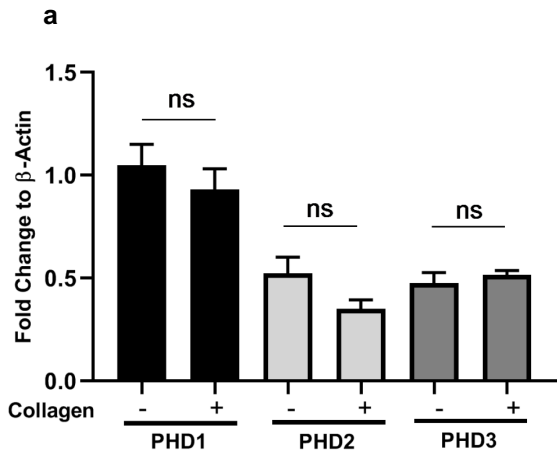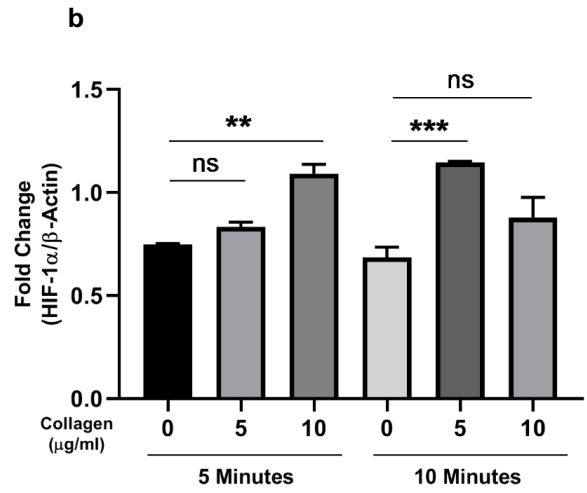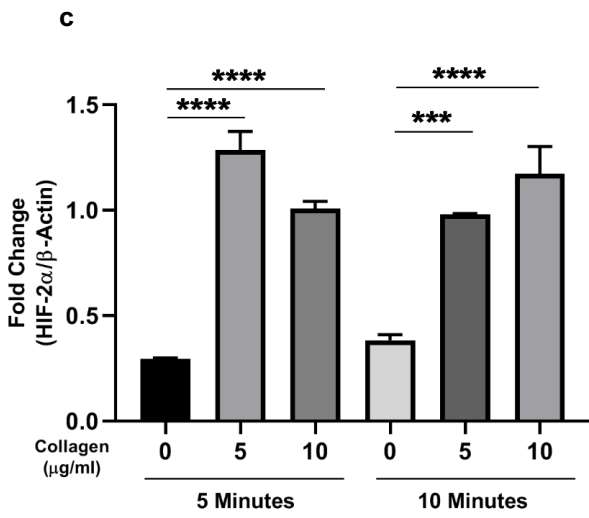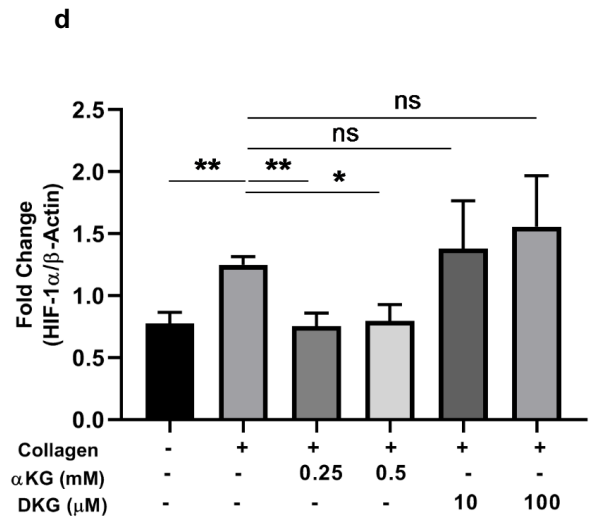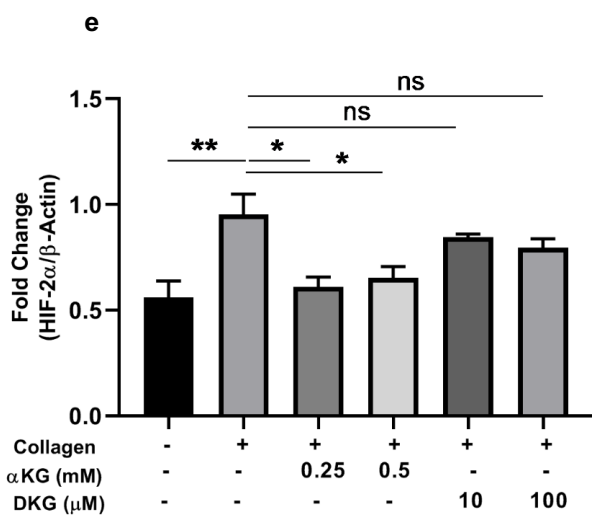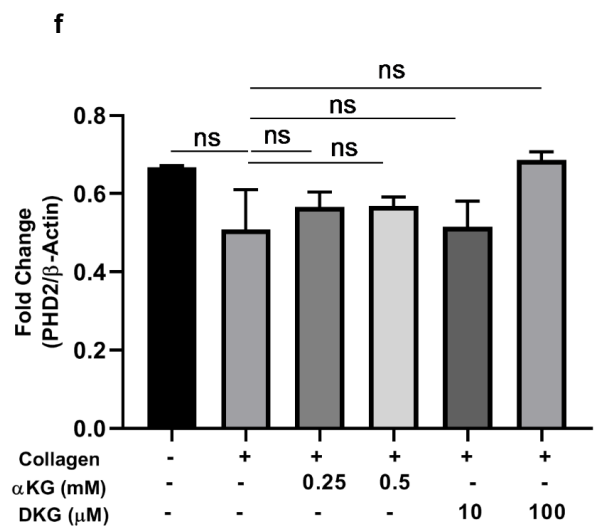

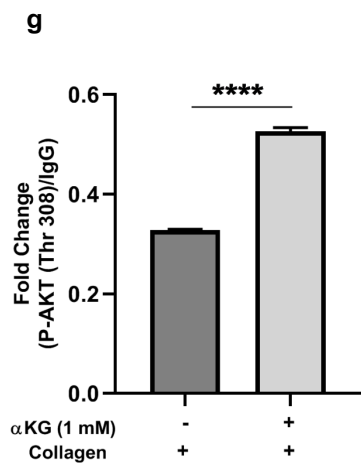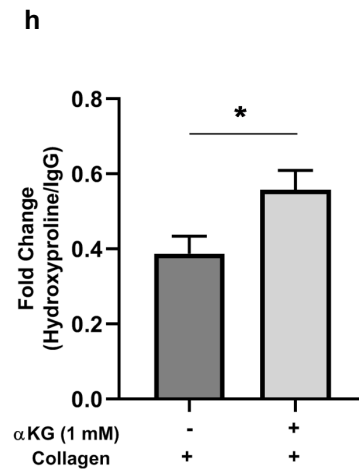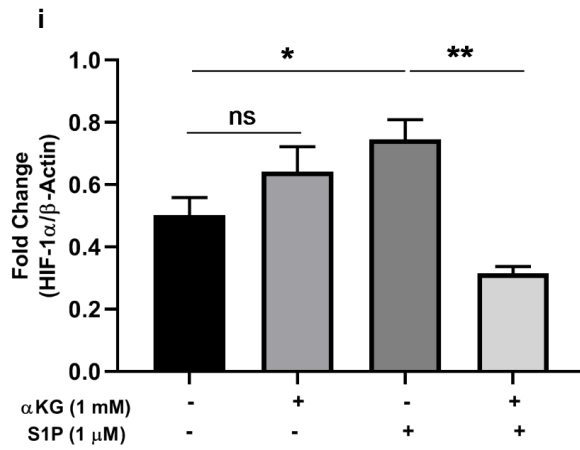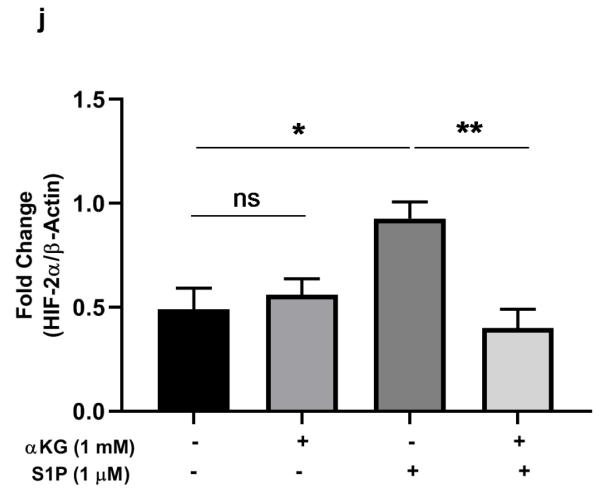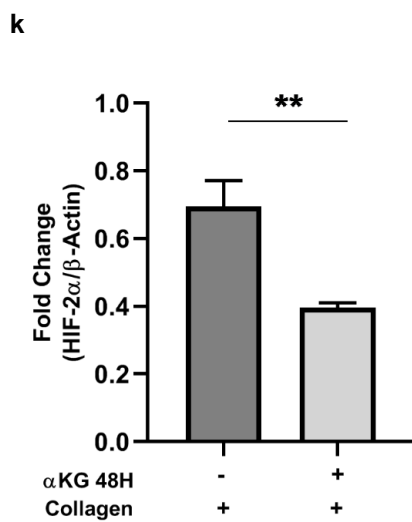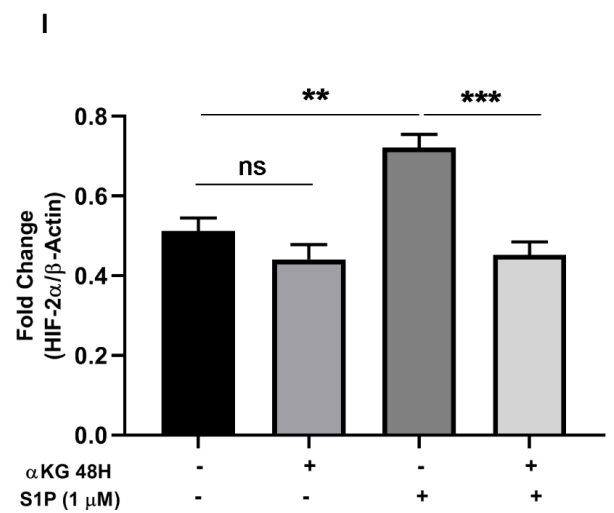

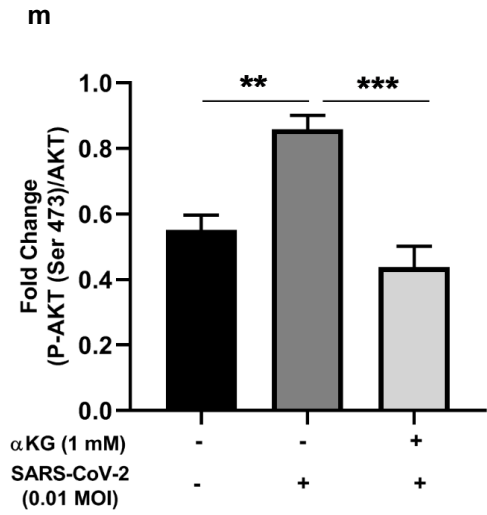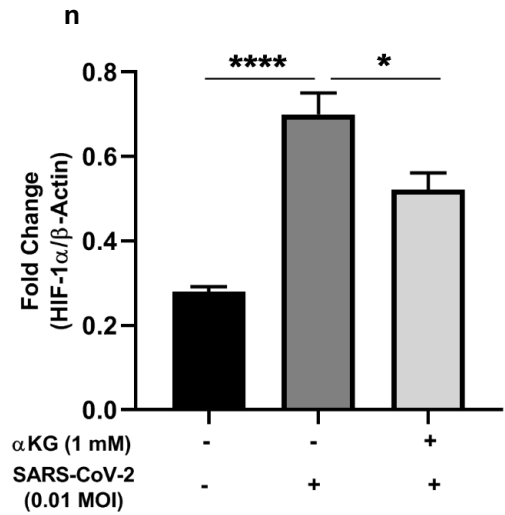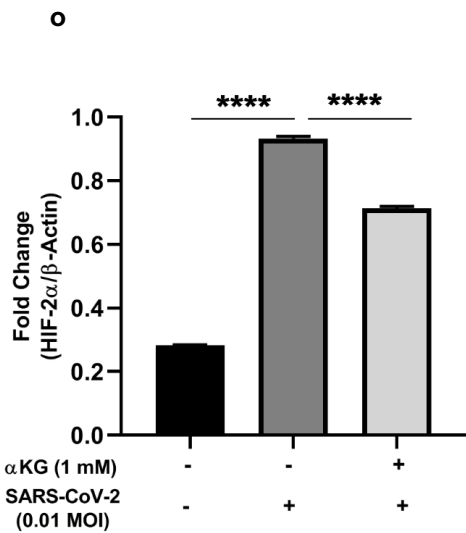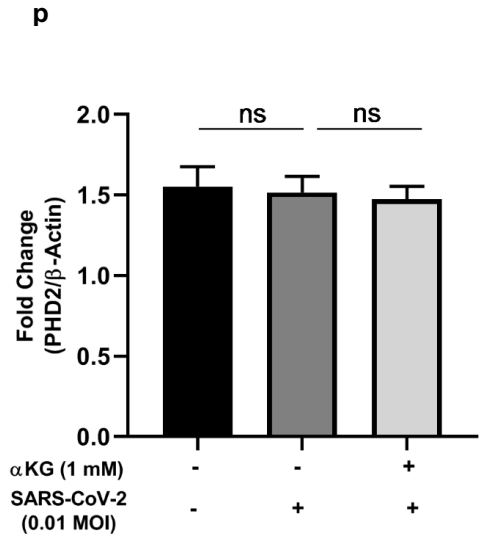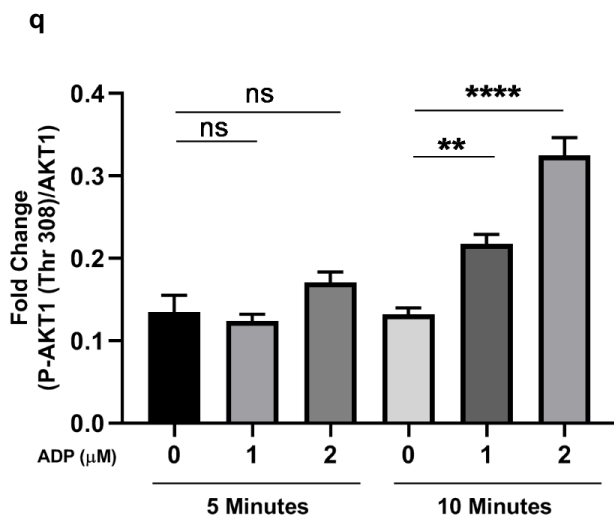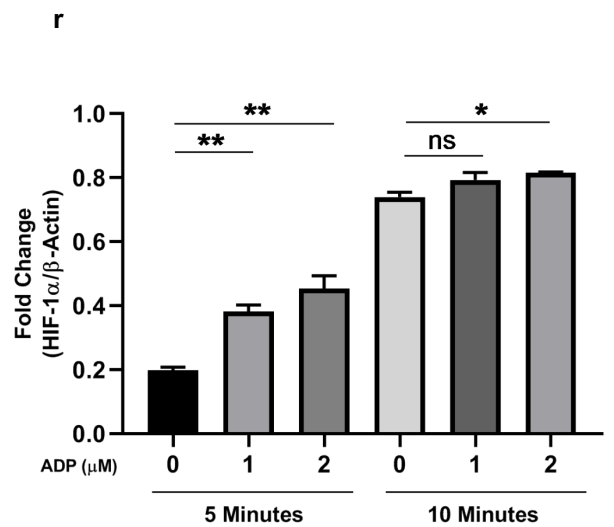

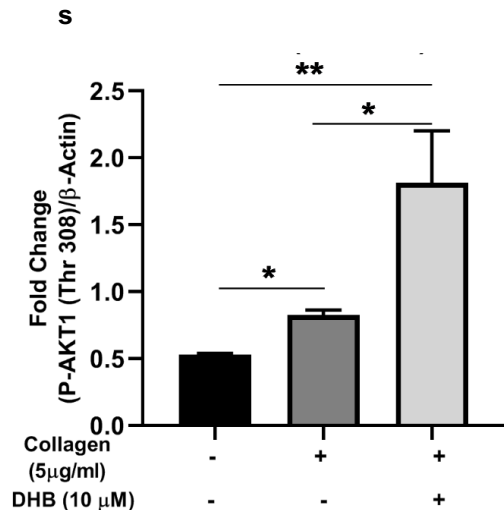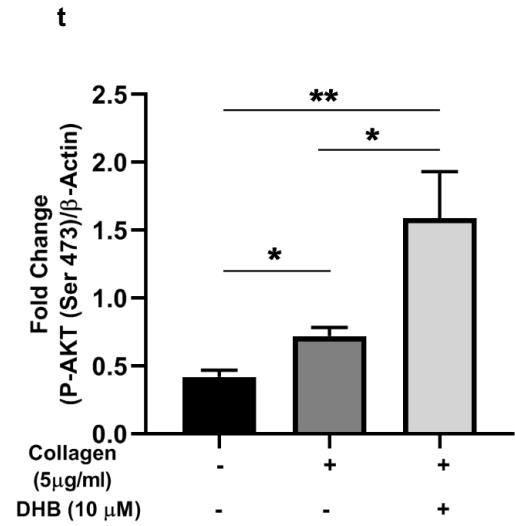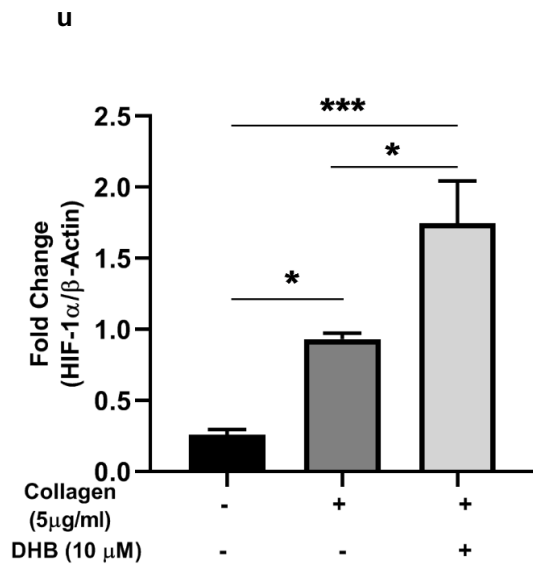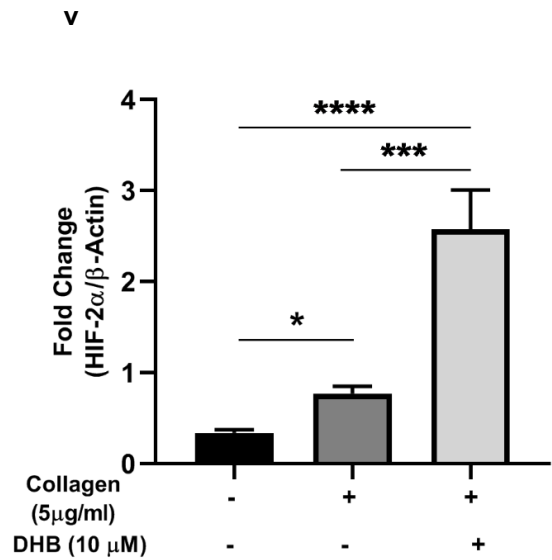

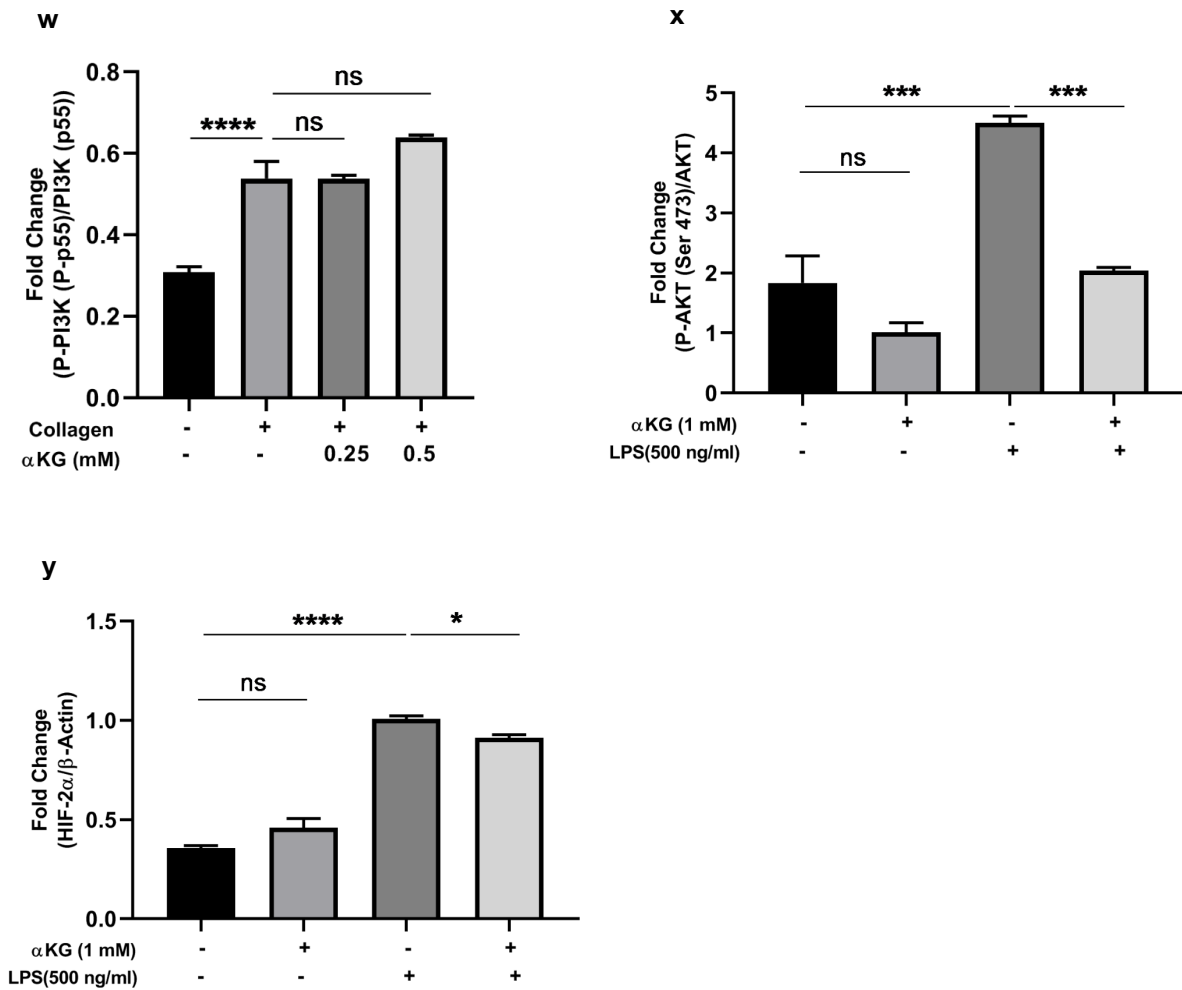

**Fig. S14. Densitometry of western blots.** Densitometric evaluation of the protein bands was performed using the Alpha imager software for western blots. Densitometry related to western depicted in main Fig. 1a-h (Fig. S14a-h), Fig. 2a (Fig. S14i-j), Fig. 4h (Fig. S14k), Fig. 4n (Fig. S14l), Fig. 6a (Fig. S14m-p). Densitometry related to western depicted in Fig. S1a (Fig. S14q-r), Fig. S1B (Fig. S14s-v), Fig. S1c (Fig. S14w), Fig. S5 (Fig. S14x-y). Bar represents mean  $\pm$  SEM from triplicate blots. (Fig. S14 a, g, h and k, unpaired t-test, ns=non-significant) (One-way ANOVA, \* $P$ <0.05, \*\* $P$ <0.01, \*\*\* $P$ <0.001, \*\*\*\* $P$ <0.0001, ns=non-significant).



**Supplementary Table S1: List of antibodies used in the study**

| <b>Antibody</b>            | <b>Manufacturer</b>           | <b>Clone No.</b>        | <b>Catalog No.</b> |
|----------------------------|-------------------------------|-------------------------|--------------------|
| hu PAC-1 FITC              | BD Biosciences                | PAC-1                   | 340507             |
| hu P-Selectin PE Cy5       | BD Biosciences                | AK-4                    | 551142             |
| hu Annexin V FITC          | BD Biosciences                |                         | 556419             |
| hu CD 41a PE               | BD Biosciences                | HIP8                    | 555467             |
| hu PHD1                    | Novus                         |                         | NB100-310          |
| hu PHD2                    | Novus                         |                         | NB100-137          |
| hu PHD3                    | Novus                         |                         | NB100-139          |
| hu PHD2                    | Cell Signalling Technology    |                         | 3293S              |
| hu PHD2                    | Cell Signalling Technology    | D31E11                  | 4835S              |
| hu HIF1 $\alpha$           | Cell Signalling Technology    | D2U3T                   | 14179S             |
| hu HIF2 $\alpha$           | Invitrogen                    | ep190b                  | MA1-16519          |
| hu Phospho PI3K            | Cell Signalling Technology    |                         | 4228               |
| hu PI3K                    | Cell Signalling Technology    |                         | 4292               |
| hu Phospho Akt1 (Thr 308)  | Invitrogen                    | B18H12L21               | 701052             |
| hu AKT1                    | Invitrogen                    | 9Q7                     | AHO1112            |
| hu Phospho Akt (Ser 473)   | Cell Signalling Technology    |                         | 9271               |
| hu AKT                     | Cell Signalling Technology    |                         | 9272               |
| Anti-Hydroxyproline        | Abcam                         |                         | ab37067            |
| hu $\alpha$ -tubulin       | Thermo Fisher Scientific, USA | TU-01                   | 13-8000            |
| hu $\beta$ -Actin          | Cell Signalling Technology    | 1300000                 | 4970               |
| m CD42c                    | USBiological                  |                         | 363337             |
| m CD45.2 APC               | Biolegend                     | 104                     | 109814             |
| m CD11b Percp 5.5          | Invitrogen                    | M1/70                   | 45-0112-82         |
| m Ly6C V450                | Invitrogen                    | HK1.4                   | 48-5932-82         |
| m Ly6G FITC                | Biolegend                     | 1A8                     | 127606             |
| m CD41a PE                 | Invitrogen                    | eBioMWRReg30 (MWRReg30) | 12-0411-82         |
| m CD11c APC Cy7            | Biolegend                     | N418                    | 117324             |
| mF4/80 PE                  | Invitrogen                    | BM8                     | 12-4801-82         |
| m HIF1 $\alpha$            | Cell Signalling Technology    | D2U3T                   | 14179S             |
| m HIF2 $\alpha$            | Invitrogen                    | ep190b                  | MA1-16519          |
| m Phospho Akt1 (Thr 308)   | Invitrogen                    | B18H12L21               | 701052             |
| m AKT1                     | Invitrogen                    | 9Q7                     | AHO1112            |
| m Phospho Akt (Ser 473)    | Cell Signalling Technology    |                         | 9271               |
| m AKT (PAN)                | Cell Signalling Technology    |                         | 9272               |
| m $\alpha$ -tubulin        | Thermo Fisher Scientific, USA | TU-01                   | 13-8000            |
| m $\beta$ -Actin           | Cell Signalling Technology    | 1300000                 | 4970S              |
| Secondary Goat Anti-Rabbit | Cell Signalling Technology    |                         | 7074               |
| Secondary Horse Anti-Mouse | Cell Signalling Technology    |                         | 7076               |

**Supplementary Table S2: List reagents used in the study**

| <b>Reagent</b>                               | <b>Manufacturer</b>       | <b>Catalog No.</b> | <b>Supplier</b>      |
|----------------------------------------------|---------------------------|--------------------|----------------------|
| Octyl alpha ketoglutarate                    | Sigma Aldrich, USA        | SML 2205           | Sigma Aldrich, USA   |
| ethyl-3-4-dihydroxybenzoic acid (DHB)        | TCI America, Portland     | D0571              | Global Lab Solutions |
| Dimethyl 2-oxoglutarate                      | Sigma Aldrich, USA        | 349631             | Sigma Aldrich, USA   |
| Collagen                                     | Bio/Data Corporation, USA | 101562             | Best Instruments     |
| ADP                                          | Bio/Data Corporation, USA | 101312             | Best Instruments     |
| Sphingosine-1-Phosphate (S1P)                | Sigma Aldrich, USA        | S9666              | Sigma Aldrich, USA   |
| Lipopolysaccharide (LPS)                     | Sigma Aldrich, USA        | L6386              | Sigma Aldrich, USA   |
| dietary $\alpha$ -ketoglutarate              | SRL, Mumbai, India        | 28386              | Linkbiotech          |
| $\kappa$ -carrageenan                        | Sigma Aldrich, USA        | 22048              | Sigma Aldrich, USA   |
| Trizol                                       | Thermo Fisher Scientific  | 15596026           | Nexgene lifescience  |
| Superscript-III reverse-transcriptase        | Invitrogen, USA           | 18080093           | Nexgene lifescience  |
| SYBR-green mix                               | Takara Bio, USA           | RR390W             | Clontech             |
| protein G Sepharose beads                    | Sigma Aldrich, USA        | 17-0618-01         | Sigma Aldrich, USA   |
| protein A Sepharose beads                    | Sigma Aldrich, USA        | 17-5280-01         | Sigma Aldrich, USA   |
| RIPA lysis buffer                            | Sigma Aldrich, USA        | R0278              | Sigma Aldrich, USA   |
| protease-phosphatase inhibitor               | Thermo Fisher Scientific  | 78441              | Nexgene lifescience  |
| $\alpha$ -ketoglutarate estimation kit       | Sigma Aldrich, USA        | MAK054             | Sigma Aldrich, USA   |
| Succinate estimation kit                     | Sigma Aldrich, USA        | MAK335             | Sigma Aldrich, USA   |
| Lactate estimation kit                       | Sigma Aldrich, USA        | MAK064             | Sigma Aldrich, USA   |
| Fumarate estimation kit                      | Sigma Aldrich, USA        | MAK060             | Sigma Aldrich, USA   |
| Pyruvate estimation kit                      | Sigma Aldrich, USA        | MAK071             | Sigma Aldrich, USA   |
| Sphingosine-1-phosphate (S1P) estimation kit | Cloud clone corp.         | CEG031Ge           | Sunny corporation    |
